# Supplementary material
Source: publisher site journal article supplement (https://www.degruyterbrill.com/publication/isbn/9783110691580/downloadAsset/9783110691580_Bibliografie.pdf)
Supplement: Supplementary file 1 [file 9783110691580_Bibliografie.pdf]

# 9 Literaturverzeichnis

## Korpusübersicht (Quellen)

### Teilkorpus „Paderborn“

#### Geschichtspulte und -tafeln (GED, PUL)

PB 1996 GED Puvogel

Ortsfeste Texte (meist auf Tafeln und Steinen) zum Gedenken an die jüdischen Opfer, dokumentiert in: Puvogel, Ulrike und Martin Stankowski (1996): Gedenkstätten für die Opfer des Nationalsozialismus. Eine Dokumentation. 2. überarbeitete und erweiterte Aufl. Bd. 1. Bundeszentrale für politische Bildung. Berlin.

PB 2005–13 PUL Müller

Paderborner Geschichtspulte aus der Reihe „Erinnern und Gedenken – Die Zerstörung der Stadt im Zweiten Weltkrieg“ (Tafel 1–16 und 18) und zum Schicksal Paderborner Juden im Zweiten Weltkrieg unter dem Titel „Erinnern und Gedenken“ (Tafel 17, 19, 20–21) 2005–2007–2013. Autoren: Rolf-Dietrich Müller, Historiker und ehemaliger Leiter des Stadtarchivs Paderborn; Andreas Gaidt, Historiker im Stadtarchiv Paderborn sowie Paderborner Geschichtspulte aus der Reihe „Zeitgeschichte. Stadt Paderborn – früher und heute“ (Tafel 22–35) 2013. Autoren: Rolf-Dietrich Müller, Historiker und Leiter des Stadtarchivs Paderborn; Andreas Gaidt, Historiker im Stadtarchiv Paderborn; Klaus Hohmann, Heimatverein Paderborn (Tafel 36–41)

#### Broschüren (BRO)

PB 2005 BRO Stadt

Stadt Paderborn (2005): Erinnern und Gedenken – Die Zerstörung der Stadt vor 60 Jahren. Broschüre im Gedenkjahr. Paderborn. (auch als pdf auf der Webseite der Stadt Paderborn verfügbar).

PB 2008 BRO Verkehrsverein

Verkehrsverein Paderborn e.V. (Hrsg.) (2008): Historischer Stadtrundgang Paderborn. Vielfalt, die für sich spricht. Paderborn: Media-Print.

PB 2009 BRO Liborius

Stadtarchiv Paderborn und Amt für Öffentlichkeitsarbeit und Stadtmarketing Paderborn (Hrsg.) (2009): Paderborn in historischen Fotografien 1. Libori – Facetten des Paderborner Volksfestes. Texte: Andreas Gaidt. Marsberg.

PB 2011 BRO Schäfer

Schäfer, Karl-Heinz (2011): Sehenswertes Paderborn. Gästeführerinnen und Gästeführer präsentieren ihre Stadt. 2. Aufl. Paderborn: „Das Heft“-Zeitschriftenverlag.

PB 2014 BRO Baukultur

Stadt Paderborn (2014): Baukulturatlas Paderborn, Paderborn: Westfalia Druck.

### **Ausstellungskataloge (KAT)**

PB 1979 KAT Stadtarchiv

Stadtarchiv Paderborn (Hrsg.) (1979): 700 Jahre Paderborner Rathaus. Ereignisse und Episoden der Stadtgeschichte. Katalog zur Ausstellung des Stadtarchivs im Museum für Stadtgeschichte Paderborn vom 21. Oktober bis 2. Dezember 1979. Paderborn: Junfermannsche Verlagsbuchhandlung.

PB 1987 KAT Stambolis

Stambolis, Barbara/Hüser, Karl/Riesenberger, Dieter/Graen, Monika/Säuberlich, Hartmut/Müller, Rolf-Dieter/Stadt Paderborn und Universität-Gesamthochschule Paderborn (Hrsg.) (1987): Paderborn 1945–1955: Zerstörung und Aufbau. Ausstellung in der Städtischen Galerie Paderborn vom 13.12.1987–31.01.1988. Paderborn: Paderborn Druck Centrum.

PB 1995 KAT Museen

Städtische Museen und Städtische Galerie Am Abdinghof (1995): Paderborn 1945. Leben im Nationalsozialismus und im Krieg; Ausstellung der Städtischen Museen, des Stadtarchivs und der Volkshochschule Paderborn, Städtische Galerie Am Abdinghof 26.3.–25.6. Paderborn: Bonifatius-Verlag.

PB 2008 KAT Gaidt

Gaidt, Andreas im Auftrag der Stadt Paderborn, Stadtarchiv (Hrsg.) (2008): Albert Renger-Patzsch zum 111. Geburtstag. Die Paderborner Aufnahmen. Eine Ausstellung des Stadtarchivs Paderborn im Museum für Stadtgeschichte vom 20.01. bis 6.04.2008. Bonn: VG Bild-Kunst.

### **Dokumentationen und Berichte (DOK)**

PB 1955 DOK Schmidt

Schmidt, Willi (1955): Stadt Paderborn. Ein Jahrzehnt Aufbau und Planung 1945–1955. Mit einem Geleitwort von Christoph Tölle. Stuttgart. Wirtschafts-Monographien: Bd. 10. Stuttgart: AWAG Verlag Max Kurz KG.

PB 1989 DOK Stambolis

Stambolis, Barbara und Karl Hüser (1989): Nachkriegszeit – Aufbaujahre 1945–1955. Paderborn. Geschichte in Bildern, Dokumenten, Zeugnissen. Eine Schriftenreihe der Stadt Paderborn, herausgegeben von Wilhelm Ferlings, Georg Hagenhoff und Franz-Josef Weber. Heft 4, Paderborn: Bonifatius.

PB 1991 DOK Hüser

Hüser, Karl und Barbara Stambolis (1991): Unter dem Hakenkreuz: Im Gleichschritt, marsch! 1935 – 1945. Paderborn. Geschichte in Bildern, Dokumenten, Zeugnissen. Eine Schriftenreihe der Stadt Paderborn, Heft 3, 2. Aufl. Paderborn: Bonifatius.

## PB 2012 DOK Verein

Gesellschaft für Christlich-Jüdische Zusammenarbeit Paderborn e.V. (Hrsg.) (2012): Für ein erneuertes Verhältnis von Christen und Juden. 25 Jahre Gesellschaft für Christlich-Jüdische Zusammenarbeit Paderborn e.V. Paderborn: Bonifatius Druck.

**Bildbände (BIB)**

## PB 1983 BIB Dressler

Dressler, Günther/Lindemann, Otto/Korn, Sigwart/Sack, Manfred (1983): Veränderungen. Bilder aus Paderborn 1937–38/1979–83. Paderborn: Verlag Bonifatius Druckerei.

## PB 1985 BIB Golücke

Golücke, Friedhelm (Hrsg.) (1985): Paderborn – wie es war. Lichtbilder aus der Zeit vor 1945 von Wilhelm Lange, Paul Michels u.a. Paderborn: Schöningh.

## PB 2002 BIB Vogt

Vogt, Ulrich (2002): Farbiges Paderborn – einst und jetzt. Spurensuche in einer alten Stadt mit Farbfotos von 1937, 1981 und 2002. Paderborn: H&S Verlag.

## PB 2003 BIB Linde

Linde, Roland und Andreas Neuwöhner (2003): Paderborn – ein verlorenes Stadtbild. Gudensberg-Gleichen: Wartberg.

**Stadtführer (STF)**

## PB 1968 STF Hohmann

Hohmann, Friedrich Gerhard (1968): Paderborn – alte Stadt an hundert Quellen. Führer durch das alte und neue Paderborn. Paderborn: Junfermannsche Verlagsbuchhandlung.

## PB 1985 STF Maasjost

Maasjost, Ludwig (1985): Paderborn heute: Geographie, Geschichte, Kultur und Wirtschaft. Paderborn: Schöningh-Verlag.

## PB 1987 STF Hohmann

Hohmann, Friedrich Gerhard (1987): Die Stadt Paderborn mit Bildern von Heinz Bauer. 4. neubearb. Aufl. Paderborn: Bonifatius-Druckerei Paderborn.

## PB 2004 STF Fischer

Fischer, Anette (2004): Paderborn. Paderborn: Bonifatius.

## PB 2006 STF Walder

Walder, Achim (2006): Sehenswertes in Paderborn und Umgebung. Walder Reiseführer. Kreuztal: Walder-Verlag.

## PB 2013 STF Imhof

Imhof, Michael (2013): Paderborn Stadtführer. Paderborn: Michael Imhof Verlag.

**Unterrichtsmaterialien (DID)**

## PB 1991 DID Düsterloh

Düsterloh, Diethelm (1991): Paderborn – Vom Werden und Wachsen unserer Stadt. Mate-

rialien, Unterrichtsentwürfe, Arbeitsmittel. Paderborn: Universität-Gesamthochschule Paderborn.

PB 1992 DID Klönne

Klönne, Arno (Hrsg.) (1992): Unser Paderborn. Bausteine der Stadtentwicklung im 19. und 20. Jahrhundert; für den Sachunterricht. Borcheln: Janus-Druck.

PB 1999 DID Dressler

Dressler, Günther (1999): Treffpunkt Paderborn. Wo 799 das Tor zum römisch-deutschen Kaisertum aufgestoßen wurde. Paderborn: H&S Verlag.

PB 2003 DID Runte

Runte, Markus (2003): Geheimnisvolles Paderborn – eine Entdeckungsreise mit Bobby und Molly. Kassel: Geheimnisvoller Verlag.

### **Stadtgeschichte – Populäre Darstellung (SGp)**

PB 1969 SGp Tack

Tack, Wilhelm (1969): Paderborn, die alte Stadt: eine Auswahl kunst- und kulturgeschichtlicher Veröffentlichungen. Aus dem Nachlass herausgegeben von Klemens Honselmann. Selbstverlag des Altertumsvereins.

PB 2000 SGp Pöppinghege

Pöppinghege, Rainer (2000): Leben an der Pader. Alltag in Paderborn 1914–1960. Erfurt: Sutton.

PB 2001 SGp Flüter

Flüter, Karl-Martin (2001): Paderborn – Streifzüge durch die Geschichte. Paderborn: TAKT-Verlag.

PB 2005 SGp Kühne

Kühne, Hans-Jörg (2005): Der Tag, an dem Paderborn unterging. Gudensberg-Gleichen: Wartberg.

PB 2005 SGp Faassen

Faassen, Dina van/Köllner, Manfred/Linde, Roland (2005): Paderborn von A bis Z. Paderborn: Bonifatius.

### **Stadtgeschichte – Fachlich fundierte Darstellung (Experten) (SGe)**

PB 1949 SGe Kiepke

Kiepke, Rudolf im Auftrag der Stadt Paderborn (Hrsg.) (1949): Paderborn: Werden – Untergang – Wiedererstehen. Künstlerische Gestaltung Heinrich Niedieck. Paderborn: Bonifatius.

PB 1951 SGe Kiepke

Kiepke, Rudolf (1951): Schicksalschronik einer Stadt. 2. Aufl. Paderborn: Junfermannsche Verlagsbuchhandlung.

## PB 1980 SGe Claus

Claus, Rainard/Fricke, Hans-Werner/Kühlert, Andreas u. a. (1980): Die Luftangriffe auf Paderborn 1939-1945. Paderborn: Selbstverlag.

## PB 1984 SGe Mues

Mues, Willi (1984): Eine Dokumentation über das Ende des Zweiten Weltkrieges zwischen Lippe und Ruhr, Sieg und Senne. 3. Aufl. Erwitte, Lippstadt: Selbstverlag.

## PB 1988 SGe Naarmann

Naarmann, Margit (1988): Die Paderborner Juden 1802–1945. Emanzipation, Integration und Vernichtung, Paderborn: Verein für Geschichte an der Universität-GH-Paderborn. (Paderborner Historische Forschungen Nr. 1)

## PB 1999 SGe Hüser

Hüser, Karl (Hrsg.) (1999): Das 19. und 20. Jahrhundert. Traditionsbildung und Modernisierung. Paderborn. Geschichte der Stadt in ihrer Region. Bd. 3. Paderborn/München/Wien/Zürich: Schöningh.

## PB 2008 SGe Grabe

Grabe, Wilhelm (Hrsg.) (2008): „Das ewig denkwürdige Jahr“. Das Kriegsende 1945 im Kreis Paderborn. Schriftenreihe des Kreisarchivs Paderborn, daraus Pöppinghege (7–24), Golücke (25–44) und Becker (45–52)

## PB 2008 SGe Westhoff

Westhoff, Stefan (2008): Das Kriegsende in Paderborn. Die letzten 11 Tage vom 22. März bis zum 1. April 1945. Norderstedt: Books on Demand.

## Hypertexte zur Stadtgeschichte (HYP)

## PB HYP City

Paderborn City-Portal, [www.paderborn.de](http://www.paderborn.de) (zuletzt abgerufen am 19.03.2020)<sup>1</sup>

## PB HYP Dom

Der Dom <http://www.derdom.de/Die-Schande-von-Paderborn.226.0.html> (zuletzt abgerufen am 31.08.2016)

## PB HYP Erzb

Erzbischöfliche Akademische Bibliothek Paderborn <http://www.eab-paderborn.de/> (zuletzt abgerufen am 19.03.2020)

## PB HYP Feuer

Kreisfeuerwehrverband Paderborn Artikel „Die schweren Luftangriffe auf Paderborn im 2. Weltkrieg“ <http://www.kfv-paderborn.de/index.php/verband/history/11-die-schweren-luftangriffe-auf-paderborn-im-2-weltkrieg> (zuletzt abgerufen am 31.08.2016)

---

<sup>1</sup> Es ist auch dann das neuere Zugriffsdatum angegeben, wenn sich die digitalen Quellen durch Erweiterungen, Überarbeitungen etc. verändert haben. Die ins Korpus aufgenommenen Texte wurden den Webseiten im Erhebungszeitraum zwischen August und Dezember 2016 entnommen.

PB HYP Hase

Drei-Hasen-Rallye zum Buch „Paderborn – einst und jetzt“ von Ulrich Vogt,  
<http://altpaderborn.de/start.html> (zuletzt abgerufen am 19.03.2020)

PB HYP Heimat

Heimatverein Paderborn, <http://heimatverein-paderborn.de/> (zuletzt abgerufen am 19.03.2020)

PB HYP Land

Paderborner Land <http://www.paderborner-land.de/deu/ausflugsziele/marktkirche.php>  
(zuletzt abgerufen am 31.08.2016)

PB HYP Libo

Liboranium <http://www.liboranium.de/Unser-Haus/Unsere-Geschichte/Zerstoerung-und-Wiederaufbau-der-Kapuzinerkirche-1945-1952.html> (zuletzt abgerufen am 27.08.2016)

PB HYP Museum

Museum für Stadtgeschichte Artikel „Paderborn im Bombenkrieg“  
[http://www.paderborn.de/microsite/adam\\_eva/stadtgeschichte/109010100000031217.php](http://www.paderborn.de/microsite/adam_eva/stadtgeschichte/109010100000031217.php) (zuletzt abgerufen am 27.08.2016)

PB HYP Westf

Internetportal „Westfälische Geschichte“ [http://www.lwl.org/westfaelische-geschichte/portal/Internet/input\\_felder/langDatensatz\\_ebene4.php?urlID=41&url\\_tabelle=tab\\_w ebsegmente](http://www.lwl.org/westfaelische-geschichte/portal/Internet/input_felder/langDatensatz_ebene4.php?urlID=41&url_tabelle=tab_w ebsegmente) (zuletzt abgerufen am 19.03.2020)

PB HYP Wiki

Wikipedia: „Geschichte der Stadt Paderborn“  
[http://de.wikipedia.org/wiki/Geschichte\\_der\\_Stadt\\_Paderborn](http://de.wikipedia.org/wiki/Geschichte_der_Stadt_Paderborn) (zuletzt abgerufen am 19.03.2020)

Jüdische Gemeinde Paderborn

[http://de.wikipedia.org/wiki/J%C3%BCdische\\_Gemeinde\\_Paderborn](http://de.wikipedia.org/wiki/J%C3%BCdische_Gemeinde_Paderborn) (zuletzt abgerufen am 19.03.2020)

Wikipedia: „Luftangriffe auf Paderborn“

[http://de.wikipedia.org/wiki/Luftangriffe\\_auf\\_Paderborn](http://de.wikipedia.org/wiki/Luftangriffe_auf_Paderborn) (zuletzt abgerufen am 19.03.2020)

PB HYP Zeit

Paderborn Früher und Heute, [www.zeitreise-paderborn.de](http://www.zeitreise-paderborn.de) (zuletzt abgerufen am 19.03.2020)

## **Audioguide (AUD)**

PB 2009–2014 AUD

Tourist Information Paderborn (2009–2014): tomis Audioguides Paderborn. MP3guide:  
<http://www.paderborn.tomis.mobi> (zuletzt abgerufen am 19.03.2020)

## Teilkorpus „Mannheim“

### Geschichtspulte und -tafeln (GED, TAF)

MA 1996 GED Puvogel

Ortsfeste Texte (meist auf Tafeln und Steinen) zum Gedenken an die jüdischen Opfer, dokumentiert in: Puvogel, Ulrike und Martin Stankowski (1996): Gedenkstätten für die Opfer des Nationalsozialismus. Eine Dokumentation. 2., überarbeitete und erweiterte Aufl. Bd. 1. Bundeszentrale für politische Bildung. Berlin.

MA 2007 TAF Stadtpunkte

Stadtarchiv Mannheim (2007): Stadtpunkte – Mannheimer Geschichte vor Ort. 167 Tafeln. Online verfügbar unter <https://www.mannheim.de/tourismus-entdecken/stadtpunkte-mannheimer-geschichte-vor-ort> (auch als App auf Smartphone) (zuletzt abgerufen am 19.03.2020)

MA 2014 APP Verdrängt

Stadtarchiv Mannheim – Institut für Stadtgeschichte (2014): „Verdrängt und ausgeplündert“: Mannheimer Juden im Dritten Reich. Kostenlose App.

### Ausstellungskataloge (KAT)

MA 1995 KAT Peters

Peters, Christian/Caroli, Michael (1995): Mannheim 1945–1949. Der Anfang nach dem Ende. 3. Auflage. Sonderveröffentlichung des Stadtarchivs Mannheim. Mannheim: Edition Quadrat.

MA 1999 KAT Schenk

Schenk, Andreas/Wagner, Sandra (1999): Eine neue Stadt muß her!: Architektur und Städtebau der 50er Jahre in Mannheim. Begleitschrift anlässlich der Ausstellung des Stadtarchivs Mannheim und des Mannheimer Architektur- und Bauarchivs e.V. vom 16. Januar bis zum 13. März 1999 in der Handwerkskammer Mannheim. Berlin: Lukas.

### Dokumentationen und Berichte (DOK, BER)

MA 1948 DOK Städte

Stadt Mannheim und Stadt Ludwigshafen (Hrsg.) (1948): Rheinbrücke Mannheim-Ludwigshafen. Mannheim: Druckerei- und Verlags-Gesellschaft.

MA 2002 DOK Peters

Peters, Christian (2002): „Glücklicherweise bilden wir eine Ausnahme“. Mannheim in den fünfziger Jahren. (Quellen und Darstellungen zur Mannheimer Stadtgeschichte 7) (Zugleich: Heidelberg, Univ., Diss., 1998: Mannheim in den 50er Jahren.). Stuttgart: Jan Thorbecke Verlag.

MA 2003 DOK Wolf

Wolf, Dieter (2003): Luftkriegsereignisse in Mannheim 1939–1945. Eine Zusammenführung deutscher und englisch-amerikanischer Quellen. 2. Auflage. Stadtarchiv Mannheim.

(130 Seiten) <https://www.stadtarchiv.mannheim.de/bibliostar/digitalisate/web74.pdf>  
(zuletzt abgerufen am 24.06.2016)

MA 2007 SGp Pflug

Pflug, Konrad/Raab-Nicolai, Ulrike/Weber, Reinhold (Hrsg.) (2007): Orte des Gedenkens und Erinnerns in Baden-Württemberg. Schriften zur politischen Landeskunde Baden-Württembergs, Bd. 35. Stuttgart: Kohlhammer.

MA 2009 DOK Reichenbecher

Reichenbecher, Hermann (2009): Ernst und Dora Reichenbecher. Eine Familie in Mannheim 1886 – 1968. Edition Winterwork.

## Bildbände (BIB)

MA 1955 BIB Pichler

Pichler, Fritz (Hrsg.) (1955): Mannheim im Aufbau. Ein Bildband über den Wiederaufbau einer zerstörten Stadt. Mannheim: Pichler & Casse.

MA 1993 BIB Schadt

Schadt, Jörg/Caroli, Michael (Hrsg.) (1993): Mannheim im Zweiten Weltkrieg 1939–1945: ein Bildband. 1. Auflage. Mannheim: Edition Quadrat.

MA 1997 BIB Schadt

Schadt, Jörg/Caroli, Michael (Hrsg.) (1997): Mannheim unter der Diktatur 1933–1939. Herausgegeben vom Stadtarchiv Mannheim. Mannheim: Edition Quadrat.

MA 2012 KAT Pfau

Reiss-Engelhorn-Museen Mannheim/Stadtarchiv Mannheim und Mannheimer Altertumsverein von 1859 (Hrsg.) (2012): Artur Pfau (1909–2002). Fotograf und Zeitzeuge Mannheims. Katalogbuch zur Ausstellung in den Reiss-Engelhorn-Museen Mannheim 2012. Beiträge zur Mannheimer Kunst- und Stadtgeschichte, Bd. 2. Heidelberg: verlag regionalkultur.

MA 2013 SGp Mannheim!

Stockert, Harald (2013): Mannheim! Geschichte erzählt in vergleichenden Ansichten. Heidelberg: verlag regionalkultur.

MA 2014 BIB Keller

Keller, Volker (2014): Alt-Mannheim vor 100 Jahren. Ein Stadtbild im Wandel. Mannheim: Wellhöfer.

## Stadtführer (STF)

MA 1984 STF Büscher

Büscher, Klaus u. a. (1984): Mannheimer Stadtführer. Mannheim: SVA Südwestdeutsche.

MA 1988 STF Baedeker

Baedeker, Karl (1988): Stadtführer Mannheim. Der bewährte Stadtführer mit allen Sehenswürdigkeiten, vielen praktischen Hinweisen und mehrfarbigen Stadtplänen. Freiburg: Baedeker.



**MA 1990 STF Svoboda**

Svoboda, Karl J. (1990): Das Mannheimer Schloß. Geschichte des Wiederaufbaus. München: Bavaria.

**MA 2005 STF Probst**

Probst, Hansjörg (2005): Kleine Mannheimer Stadtgeschichte. Regensburg: Verlag Friedrich Pustet.

**MA 2007 STF Ellrich**

Ellrich, Hartmut (2007): Mannheim. Rundgänge durch die Geschichte. Erfurt: Sutton Verlag.

**Stadtgeschichte – Populäre Darstellung (SGp)****MA 1950 SG Walter**

Walter, Friedrich (1950): Schicksal einer deutschen Stadt. Geschichte Mannheims 1907–1945. Bd. 2 (1925 – 1945) als Fortsetzung des Jubiläumswerkes „Mannheim in Vergangenheit und Gegenwart“. Frankfurt a.M.: Knapp.

**MA 1979 SGp Salm**

Salm, Fritz (1979): Im Schatten des Henkers. Widerstand in Mannheim gegen Faschismus und Krieg. 2. verbesserte Auflage. Frankfurt a.M.: Röderberg-Verlag.

**MA 2003 SGp Keller**

Keller, Volker (2003): Mannheim im Bombenkrieg 1940–1945. Gudensberg-Gleichen: Wartberg.

**MA 2005 SGp Hirsch**

Hirsch, Hans-Joachim (2005): „Ich habe Dich bei Deinem Namen gerufen.“. Die Gedenkskulptur für die jüdischen Opfer des Nationalsozialismus in Mannheim. Mannheim: Brandt.

**MA 2006 SGp Fiedler**

Fiedler, Helmut (2006): Mensch Mannem! Geschichten und Anekdoten aus dem alten Mannheim. Gudensberg-Gleichen: Wartberg.

**MA 2008 SGe Perrey**

Perrey, Hans-Joachim (2008): Zwischen Krieg, Wiederaufbau und Demontage – Die BASF 1939 Bis 1952/53. Hrsg. v. Stadtverwaltung Ludwigshafen am Rhein.

**MA 2009 SGp Caroli**

Caroli, Michael/Nieß, Ulrich (Hrsg.) (2009): 1914–2007 – Geschichte der Stadt Mannheim. 400 Jahre bewegen. Heidelberg: verlag regionalkultur.

**MA 2009 SGp Mehler**

Mehler, Karl Heinz (2009): Zwischen Weltwirtschaftskrise und totalem Krieg. Mannheimer Zeitzeugen erzählen über ihr privates Leben. Mannheim: Wellhöfer.

**MA 2013 SGp Ellrich**

Ellrich, Hartmut (2013): Barockschloss Mannheim. Geschichte und Geschichten. Karlsruhe: Braun.

MA 2013 SGp Fritsche

Fritsche, Christiane (2013): Ausgeplündert, zurückerstattet und entschädigt. Arisierung und Wiedergutmachung in Mannheim. Sonderveröffentlichung des Stadtarchivs Mannheim Bd. 39. Heidelberg: verlag regionalkultur.

**Stadtgeschichte – Fachlich fundierte Darstellung (Experten) (SGe)**

MA 1971 SGe Fliedner

Fliedner, Hans-Joachim (1971): Die Judenverfolgung in Mannheim 1933–1945. Veröffentlichungen des Stadtarchivs Mannheim Bd. 1. Stuttgart: Kohlhammer.

MA 2004 SGe Connert

Connert, Beate (2004): Mannheim. Vom Wiederaufbau einer deutschen Stadt. Weimar/Rostock: Edition M.

MA 2009 SGe Kaiser

Kaiser, Peter (2009): Der Landkreis Mannheim im Nationalsozialismus. Heidelberg: Eigenverlag Rhein-Neckar-Kreis.

MA 2011 SGe Brenneisen

Brenneisen, Marco (2011): Das Konzentrationslager Mannheim-Sandhofen im Spiegel der Öffentlichkeit. Die Rezeptionsgeschichte eines KZ-Außenlagers. Marburg: Tectum.

MA 2012 SGe Berking

Stadtforschungsschwerpunkt der Technischen Universität Darmstadt (Hrsg.) (2012): Die Seele Mannheims – Eine Studie zur Eigenlogik der Stadt. Bearbeitet von Helmut Berking, Birgit Glock, Kris Vera Hartmann, Martina Löw, Katrin Nötling, Anna Laura Quermann, Dieter Schott und Marcus Stippak. Institut für Stadtgeschichte Nr. 37. Ostfildern: Jan Thorbecke Verlag. Daraus: Martina Löw und Anna Laura Quermann: Mannheim - Weltoffenheit vor Ort (S. 17–48), ab S. 29, sowie Dieter Schott: Maßnahmen zur gezielten Verbesserung des Image im 20. Jahrhundert (S. 55–98), S. 76–84.

**Audioguide (AUD)**

MA 2009–2016 AUD Tomis

Tomis Audioguide Mannheim (2009–2016). MP3guide:  
<http://www.mannheim.tomis.mobi/> (zuletzt abgerufen am 19.03.2020)

**Hypertexte zur Stadtgeschichte (HYP)**

MA HYP Rhein-Neckar-Wiki

Rhein-Neckar-Wiki zum Thema „Zweiter Weltkrieg in Mannheim“  
[http://rhein-neckar-wiki.de/Zweiter\\_Weltkrieg\\_in\\_Mannheim](http://rhein-neckar-wiki.de/Zweiter_Weltkrieg_in_Mannheim) (zuletzt abgerufen am 19.03.2020)

MA HYP Schlossgeschichte

Artikel zur „Schlossgeschichte“ der Internetseite der Universität Mannheim

<https://www.uni-mannheim.de/1/renaissance/schlossgeschichte/> (zuletzt abgerufen am 18.12.2016)

#### MA HYP Stadtarchiv

Stadtarchiv Mannheim „Chronik der Stadt“ und

<https://www.mannheim.de/tourismus-entdecken/chronik-stadt-mannheim-meilensteine-20-jahrhundert>, vgl. auch <https://www.stadtarchiv.mannheim.de/zeittafel> (zuletzt abgerufen am 19.03.2020)

<https://www.mannheim.de/tourismus-entdecken/stolpersteine> (zuletzt abgerufen am 19.03.2020)

#### MA HYP Stadtportrait

Stadtportrait auf der Seite der Touristinformation der Stadt Mannheim

<http://www.tourist-mannheim.de/de/Stadtportrait> (zuletzt abgerufen am 18.12.2016)

<http://www.tourist-mannheim.de/de/Sehenswuerdigkeiten-und-Freizeit/Sehenswertes/Konkordienkirche> (zuletzt abgerufen am 19.03.2020)

#### MA HYP Wikipedia

Wikipedia-Artikel „Luftangriffe auf Mannheim“, „Geschichte Mannheims“, „Schloss Mannheim“ und „Jüdische Gemeinde“

[https://de.wikipedia.org/wiki/Luftangriffe\\_auf\\_Mannheim](https://de.wikipedia.org/wiki/Luftangriffe_auf_Mannheim) (zuletzt abgerufen am 19.03.2020)

[https://de.wikipedia.org/wiki/Geschichte\\_Mannheims](https://de.wikipedia.org/wiki/Geschichte_Mannheims) (zuletzt abgerufen am 19.03.2020)

[https://de.wikipedia.org/wiki/Schloss\\_Mannheim](https://de.wikipedia.org/wiki/Schloss_Mannheim) (zuletzt abgerufen am 19.03.2020)

[https://de.wikipedia.org/wiki/J%C3%BCdische\\_Gemeinde\\_Mannheim#1900.E2.80.93heute](https://de.wikipedia.org/wiki/J%C3%BCdische_Gemeinde_Mannheim#1900.E2.80.93heute) (zuletzt abgerufen am 19.03.2020)

#### MA HYP Zeitgeschichtliches

Zeitgeschichtliches Museum Mannheim

<http://www.zgma.de/luftangriff-auf-mannheim/> (zuletzt abgerufen am 19.03.2020)

## Teilkorpus „Bremen“

### Geschichtspulte und –tafeln (GED, TAF)

#### HB 1996 GED Puvogel

Ortsfeste Texte (meist auf Tafeln und Steinen) zum Gedenken an die jüdischen Opfer, dokumentiert in: Puvogel, Ulrike und Martin Stankowski (1996): Gedenkstätten für die Opfer des Nationalsozialismus. Eine Dokumentation. 2., überarbeitete und erweiterte Aufl. Bd. 1. Bundeszentrale für politische Bildung, Berlin.

#### HB 2006 TAF Bauwerke

Bremer Tourismuszentrale und Landesamt für Denkmalpflege (2006): Bauwerke erzählen

Geschichte – Altstadt und Schlachte. Ca. 150 zweisprachige Tafeln (dt.-engl.) mit QR-Codes, davon 23 ausgewählt.

HB 2013-2014 HYP BremenpediA

Landesamt für Denkmalpflege (2013–2014): Wikipedia-Projekt im Rahmen von BremenpediA. Ca. 130 QR-Codes, als QRpedia-Aufkleber auf den Tafeln angebracht. URL: [https://de.wikipedia.org/wiki/Wikipedia:WikiProjekt\\_Bremen/BremenpediA/QRpedia](https://de.wikipedia.org/wiki/Wikipedia:WikiProjekt_Bremen/BremenpediA/QRpedia) (zuletzt abgerufen am 19.03.2020)

## **Broschüren (BRO)**

HB 2010 BRO Focke

Focke-Museum (2010): Bremen 1945 bis 2010 – Soviel Wandel war nie. Flyer zur Sonderausstellung. Online unter: [http://aulbremen.de/downloads/BU\\_Sonder.pdf](http://aulbremen.de/downloads/BU_Sonder.pdf) (zuletzt abgerufen am 19.03.2020)

## **Ausstellungskataloge (KAT)**

HB 1957 KAT Schünemann

Schünemann, Carl (1957): Kunsthalle Bremen. Zwölf Jahre Wiederaufbau. Ausstellung Kunsthalle Bremen 13. Juni bis 28. Juni 1957. Bremen: Schünemann.

HB 2006 KAT Syring

Syring, Eberhard und Volker Plagemann (Hrsg.) (2006): „1952“ – bremisch und doch modern. Herausgegeben im Auftrag des Bremer Zentrums für Baukultur von Volker Plagemann. Delmenhorst: Aschenbeck & Holstein. (Schriftreihe Bremer Zentrum für Baukultur 7).

## **Dokumentationen und Berichte (DOK)**

HB 1965 DOK Beidatsch

Beidatsch, Alfred (1965): Wiederaufbau Bremen-Stephaniegebiet. Herausgegeben vom Bundesministerium für Wohnungswesen Städtebau und Raumordnung.

HB 1978 DOK Aufbau

Drewes, Hartmut (1978): Gemeinsam begann es 1945. „Der Aufbau“ schrieb das erste Kapitel. Originalgetreuer Nachdruck des „Aufbau“, Organ der Kampfgemeinschaft gegen den Faschismus (KGF), Bremen 1945/46. Frankfurt a.M.: Röderberg.

HB 1989 DOK Focke

Focke, Harald/Hillmer, Kurth (1989): Auch hier bei uns war Krieg. Die Jahre 1938 bis 1945 im Raum zwischen Bremen und Diepholz. Arbeitskreis Regionalgeschichte.

HB 2005 DOK Müller

Müller, Hartmut/Rohenberg, Günther (2005): Kriegsende in Bremen. Erinnerungen, Berichte, Dokumente. Bremen: Edition Temmen.

HB 2007 DOK Lohse

Lohse, Jörn (2007): Die Holocaust-Denkmäler in Bremen. Hamburg: Diplomica.

HB 2009 DOK Markreich

Markreich, Max (2009): Geschichte der Juden in Bremen und Umgebung. Bd. 1., 2. Auflage. Schriftenreihe Erinnern für die Zukunft e.V. Bremen: Edition Temmen.

### **Bildbände (BIB)**

HB 1995 BIB Schminck

Schminck-Gustavus, Christoph (1995): Bremen kaputt. Bilder vom Krieg 1939 – 1945. Bremen: Edition Temmen.

HB 1997 BIB Aschenbeck

Aschenbeck, Nils (Hrsg.) (1997): Bremen. Der Wiederaufbau 1945–1960. Mit Fotos von Werner Krysl und Rosemarie Rospek. Bremen: Edition Temmen.

HB 1999 BIB Gutmann

Gutmann, Hermann und Sophie Hollands (1999): Krieg und Frieden in Bremen. Bilder von 1914 bis 1939. Bremen: Döll.

HB 1999 BIB Spiess

Spiess, Christine (1999): Rundflug über das alte Bremen. Godenberg-Gleichen: Wartberg.

### **Stadtführer (STF)**

HB 1955 STF Gläbe

Gläbe, Friedrich (1955): Bremen einst und jetzt: eine Chronik. Herausgegeben von der Arbeitsgemeinschaft „Bremer Schule“ e.V. Bremen: Eilers & Schünemann.

HB 1965 STF Lindemann

Lindemann, Marie (1965). Stadtführer Bremen. In Zusammenarbeit mit dem Verkehrsverein der Freien Hansestadt Bremen. Bremen: Carl Schünemann Verlag.

HB 1983 STF Baedeker

Baedeker, Karl (1983): Bremen, Bremerhaven. Kurzer Stadtführer. 4. Auflage mit 15 Karten und Plänen und 35 Zeichnungen. Freiburg: Baedeker.

HB 1985 STF Holtgreffe

Holtgreffe, Heinz (1985): Hallo Bremen. Ein Stadtführer in deutsch und englisch. Bremerhaven: Nordwestdeutsche Verlagsgesellschaft.

HB 1992 STF Gutmann

Gutmann, Hermann (1992): Stadtführer Bremen. Neu überarbeitet. Bremen: Johann Heinrich Döll.

HB 2002 STF Baedeker

Bremen, Bremerhaven (2002): Stadtführer von Karl Baedeker. Mit 12 Karten & Plänen und 31 Zeichnungen. Ostfildern-Kemnat: Baedeker Verlag.

HB 2004 STF Kootz

Kootz, Wolfgang (2004): Freie Hansestadt Bremen mit Bremerhaven und Worpswede: Stadtführer mit 100 Farbbildern und Stadtplan. Ubstadt-Weiher: Kraichgau Verlag.

HB 2006 STF Dappen

Dappen, Claudia/Fischer, Peter (2006): Bremen entdecken & erleben: Ein Stadtführer für Kinder und ihre Eltern. Bremen: Edition Temmen.

HB 2010 STF Möbst

Möbst, Anja/Buchholz, Katrin/Staebner, Nicole (2010): Kennst du Bremen? Stadtführer für kleine und große Entdecker. 3. vollständig aktualisierte Neuauflage. Bremen: Schünemann.

### **Stadtgeschichte – Populäre Darstellung (SGp)**

HB 1948 SGp Zeugnisse

Unbekannter Autor (1948): Neues Bremen. Zeugnisse vom Wiederaufbau. Frühe Nachkriegsbroschüre. Keine Angabe zum Verlag.

HB 1986 SGp Meyer

Meyer, Enno (1986): Menschen zwischen Weser und Ems 1933–1945. Wie sie lebten, was sie erlebten. Quellen zur Regionalgeschichte Nordwest-Niedersachsens. Heft 2. Oldenburg: Holzberg.

HB 2005 SGp Stute

Stute, Klaus und Annette Zwilling (2005): Bremen. Liebeserklärung an eine Stadt. Bremen: Bremer Drucksachen Service.

HB 2006 SGp Chronik

Senat der Freien Hansestadt Bremen (Hrsg.) (2006): Die Freie Hansestadt Bremen. Kleine Bremer Chronik. Redaktion: Gabriele Brünings. Online unter [http://www.bremen.de/fastmedia/36/bremen\\_chronik.pdf](http://www.bremen.de/fastmedia/36/bremen_chronik.pdf) (zuletzt abgerufen am 19.03.2020)

HB 2007 SGp Elmhäuser

Elmhäuser, Konrad (2007): Geschichte Bremens. München: C. H. Beck.

### **Stadtgeschichte – Fachlich fundierte Darstellung (Experten) (SGe)**

HB 1976 SGe Brandt

Brandt, Peter (1976): Antifaschismus und Arbeiterbewegung. Aufbau – Ausprägung – Politik in Bremen 1945/46. Hamburger Beiträge zur Sozial- und Zeitgeschichte Bd. XI. Hamburg: Hans Christians Verlag.

HB 1985 SGe Wollenberg

Wollenberg, Jörg (1985): 8. Mai 1945. Neugeordneter Wiederaufbau oder verhinderte Neuordnung. Bremen: Zentraldruckerei der Universität Bremen.

HB 1995 SGe Schwarzwälder

Schwarzwälder, Herbert (1995): Geschichte der Freien Hansestadt Bremen. Bremen in der NS-Zeit (1933–1945). Erweiterte und verbesserte Auflage Bremen: Edition Temmen.

## HB 2005 SGe Obenaus

Obenaus, Herbert (Hrsg.) (2005): Historisches Handbuch der jüdischen Gemeinden in Niedersachsen und Bremen. Bd. 1. Göttingen: Wallstein Verlag.

## HB 2008 SGe Barfuß

Barfuß, Karl Marten/Müller, Hartmut/Tilgner, Daniel (Hrsg.) (2008): Die Geschichte der Freien Hansestadt Bremen von 1945 bis 2005. Bd. 1: 1945 bis 1969. Bremen: Edition Temmen.

## HB 2010 SGe Meyer

Meyer, Marcus (2010): Bruder und Bürger: Freimaurerei und Bürgerlichkeit in Bremen von der Aufklärung bis zum Wiederaufbau nach 1945. Bremen: Edition Temmen.

## HB 2014 SGe Syring

Syring, Eberhard (2014): Bremen und seine Bauten. Bremen: Carl Schünemann Verlag.

**Hypertexte zur Stadtgeschichte (HYP)**

## HB HYP Boettcher

<http://www.boettcherstrasse.de/de/node/45> (zuletzt abgerufen am 28.12.2020)

## HB HYP Cityguide

Cityguide AG (Hrsg.): Cityguide Bremen. Der mobile Reise- und Freizeitführer für die Stadt an der Weser. Webbasiertes Angebot, frei verfügbar unter: <http://bremen.cityguide.de/> und <http://www.bremen-freizeit.de/bremen/stadt/abc/cna020-stadt-geschichte.php> (zuletzt abgerufen am 28.12.2016)

## HB HYP Feuerwehr

<http://www.feuerwehr-bremen.org/ueber-uns/historie/zerstoerung-bremens/> (zuletzt abgerufen am 19.03.2020)

## HB HYP Goruma

<http://www.goruma.de/Staedte/B/Bremen/Stadtgeschichte.html> (zuletzt abgerufen am 19.03.2020)

## HB HYP Historic

[http://www.historic.de/Bremen\\_im\\_Krieg/Bombenangriffe/BombenangriffeMain.htm](http://www.historic.de/Bremen_im_Krieg/Bombenangriffe/BombenangriffeMain.htm) (zuletzt abgerufen am 19.03.2020)

## HB HYP Landesportal

<http://landesportal.bremen.de/die-geschichte-bremens-33803695> (zuletzt abgerufen am 28.12.2020)

## HB HYP Radiobremen

<http://www.radiobremen.de/wissen/geschichte/ns-zeit/bremer-bombennacht100.html> (zuletzt abgerufen am 30.12.2016)

<http://www.radiobremen.de/wissen/geschichte/die-zerstoerung100.html> (zuletzt abgerufen am 30.12.2016)

<http://www.radiobremen.de/wissen/geschichte/ns-zeit/zweiter-weltkrieg/kriegsende276.html> (zuletzt abgerufen am 30.12.2016)

HB HYP Relikte

[http://relikte.com/brm\\_ls/index.htm](http://relikte.com/brm_ls/index.htm) (zuletzt abgerufen am 19.03.2020)

HB HYP Stolpersteine

<http://www.stolpersteine-bremen.de/recherche.php> (zuletzt abgerufen am 19.03.2020)

HB HYP Tourismus

Bremen City-Portal Bremen erleben!, <http://www.bremen.de/tourismus/stadt-leute/geschichte> (zuletzt abgerufen am 19.03.2020)

HB HYP Wikipedia

[https://de.wikipedia.org/wiki/Bremen\\_zur\\_Zeit\\_des\\_Nationalsozialismus](https://de.wikipedia.org/wiki/Bremen_zur_Zeit_des_Nationalsozialismus) (zuletzt abgerufen am 19.03.2020)

[https://de.wikipedia.org/wiki/Geschichte\\_der\\_Stadt\\_Bremen](https://de.wikipedia.org/wiki/Geschichte_der_Stadt_Bremen) (zuletzt abgerufen am 19.03.2020)

## Bibliografie (Sekundärwerke)

Abraham, Werner (2015): Konstruktionsgrammatik ist analytische Grammatik unter empirischen Frequenzvoraussetzungen. Die „Passivfamilie“. *Deutsche Sprache* 42, 74–97.

Adamzik, Kirsten (1987): Probleme der Negation im Deutschen. Studien zur zeitgenössischen Grammatikographie. Münster: Nodus Publikationen.

Adamzik, Kirsten/Rolf, Eckard (1998): Fachsprachliche Phänomene in Gebrauchstexten. In: Hoffmann, Lothar/Kalverkämper, Hartwig/Wiegand, Herbert Ernst (Hrsg.): *Fachsprachen. Languages for Special Purposes. Ein internationales Handbuch zur Fachsprachenforschung und Terminologiewissenschaft*. Berlin, New York: de Gruyter (Handbücher zur Sprach- und Kommunikationswissenschaft 14.1), 588–594.

Agamben, Giorgio (2008): *Was ist ein Dispositiv?* Zürich, Berlin: Diaphanes.

Ágel, Vilmos (2000): *Valenztheorie*. Tübingen: Narr.

Ágel, Vilmos (2001): Gegenwartsgrammatik und Sprachgeschichte. Methodologische Überlegungen am Beispiel der Serialisierung im Verbalkomplex. *ZGL* 29, 319–331.

Angermüller, Johannes (2007): Diskurs als Aussage und Äußerung – Die enunziative Dimension in den Diskurstheorien Michel Foucaults und Jacques Lacans. In: Warnke, Ingo H. (Hrsg.): *Diskurslinguistik nach Foucault. Theorie und Gegenstände*. Berlin, New York: de Gruyter, 53–80.

Arich-Gerz, Bruno (2009): Die Lehre vom Luftkrieg: E-Learning und die Mediatisierung von Zeiteugenschaft. In: Meyer, Erik (Hrsg.): *Erinnerungskultur 2.0. Kommemorativ Kommunikation in digitalen Medien*. Frankfurt a. M., New York: Campus, 67–86.

Arnold-De Simone, Silke (2007): Die Konstanz der Ruine. Zur Rezeption traditioneller ästhetischer Funktionen der Ruine in städtischer Baugeschichte und im Trümmerfilm nach 1945. In: Böhn, Andreas/Mielke, Christine (Hrsg.): *Die zerstörte Stadt. Mediale Repräsentationen urbaner Räume von Troja bis SimCity*. Bielefeld: transcript, 251–271.



- Assmann, Aleida (2006): *Der lange Schatten der Vergangenheit. Erinnerungskultur und Geschichtspolitik*. München: Beck.
- Assmann, Aleida (2009): *Erinnerungsräume. Formen und Wandlungen des kulturellen Gedächtnisses*. 4. Aufl. München: Beck.
- Assmann, Aleida/Frevert, Ute (1999): *Geschichtsvergessenheit – Geschichtsversessenheit. Vom Umgang mit deutschen Vergangenheiten nach 1945*. Stuttgart: Deutsche Verlagsanstalt.
- Assmann, Jan (1988): Kollektives Gedächtnis und kulturelle Identität. *Kultur und Gedächtnis*. Frankfurt a.M.: Suhrkamp, 9–19.
- Auer, Peter (1986): Kontextualisierung. In: *Studium Linguistik* 19, 22–47.
- Auer, Peter (1992): Introduction: John Gumperz' Approach to Contextualization. In: ders./Di Luzio, Aldo (Hrsg.): *The Contextualization of Language*. Amsterdam: Benjamins, 1–38.
- Auer, Peter/Pfänder, Stefan (2011): *Constructions: Emergent or emerging?* In: dies. (Hrsg.): *Constructions: Emerging and Emergent*. Berlin, Boston: de Gruyter, 1–21.
- Augé, Marc (2012): *Nicht-Orte*. 3. Aufl. München: Beck.
- Bär, Jochen A. (2000): Lexikographie und Begriffsgeschichte. Probleme, Paradigmen, Perspektiven. In: *Wörterbücher in der Diskussion IV. Vorträge aus dem Heidelberger Lexikographischen Kolloquium*. Herausgegeben von Herbert Ernst Wiegand. Tübingen: Niemeyer, 29–84.
- Barthes, Roland (1964): *Mythen des Alltags*. Frankfurt a. M.: Suhrkamp.
- Barthes, Roland (1990): *Der entgegenkommende und der stumpfe Sinn. Kritische Essays III*. Frankfurt a. M.: Suhrkamp.
- Baumgart, Reinhard (1999): Das Luftkriegstrauma der Literatur. W. G. Sebald entdeckt eine deutsche Gedächtnislücke. In: *ZEIT online*. Online unter [http://www.zeit.de/1999/18/Das\\_Luftkriegstrauma\\_der\\_Literatur/komplettansicht](http://www.zeit.de/1999/18/Das_Luftkriegstrauma_der_Literatur/komplettansicht) (zuletzt abgerufen am 19.03.2020)
- Beckers, Katrin (2012): *Kommunikation und Kommunizierbarkeit von Wissen. Prinzipien und Strategien kooperativer Wissenskonstruktion*. Berlin: Erich Schmidt.
- Behrens, Heike (2009): Konstruktionen im Spracherwerb. *ZGL* 37, 427–444.
- Belica, Cyril/Perkuhn, Rainer (2015): Feste Wortgruppen/Phraseologie I: Kollokationen und Syntagmatische Muster. In: Haß, Ulrike/Storjohann, Petra (Hrsg.): *Handbuch Wort und Wortschatz*. Berlin, Boston: de Gruyter, 201–225.
- Bittner, Thomas/Smith, Barry (2001): A Unified Theory of Granularity, Vagueness, and Approximation. In: *Proceedings of the 1st Workshop on Spatial Vagueness, Uncertainty, and Granularity (SVUG01)*, 1–39. Online unter <http://www.acsu.buffalo.edu/~bittner3/BittnerSmithSVUG01.pdf> (zuletzt abgerufen am 20.06.2022)
- Bode, Volker (2002): *Kriegszerstörung und Wiederaufbau deutscher Städte nach 1945*. In: Institut für Länderkunde Leipzig/Friedrich, Klaus/Hahn, Barbara/Popp, Herbert (Hrsg.): *Nationalatlas Bundesrepublik Deutschland*, 5. – Dörfer und Städte. Heidelberg, Berlin: Spektrum Akademischer Verlag, 88–91.

- Böke, Karin (1996): Politische Leitvokabeln in der Adenauer Ära. Zu Theorie und Methodik. In: Böke, Karin/Liedtke, Frank/Wengeler, Martin (Hrsg.): Politische Leitvokabeln in der Adenauer-Ära. Berlin, New York: de Gruyter (Sprache, Politik, Öffentlichkeit, 8), 19–50.
- Böke, Karin (1996): Zwischen Föderalismus und Zentralismus. Leitvokabeln zum bundesstaatlichen Aufbau. In: Böke, Karin/Liedtke, Frank/Wengeler, Martin (Hrsg.): Politische Leitvokabeln in der Adenauer-Ära. Berlin, New York: de Gruyter (Sprache, Politik, Öffentlichkeit, 8), 51–130.
- Böke, Karin (2006): Überlegungen zu einer Metaphernanalyse im Dienst einer „parzellierten“ Sprachgeschichtsschreibung [1996]. In: Wengeler, Martin (Hrsg.): Sprachgeschichte als Zeitgeschichte. Konzepte, Methoden und Forschungsergebnisse der Düsseldorfer Sprachgeschichtsschreibung für die Zeit nach 1945. Hildesheim, New York: Olms, 194–223.
- Bondi, Marina/Scott, Mike (2010): *Keyness in Texts*. Amsterdam/Philadelphia: John Benjamins.
- Breindl, Eva (2004): Relationsbedeutung und Konnektorbedeutung: Additivität, Adversativität und Konzessivität. In: Blühdorn, Hardarik/Breindl, Eva/Waßner, Ulrich H. (Hrsg.): *Brücken schlagen. Grundlagen der Konnektorensemantik*. Berlin, New York: de Gruyter, 225–253.
- Breindl, Eva (2014): C4.3 Konzessive Konnektoren. In: Dies./Volodina, Anna/Waßner, Ulrich Hermann: *Handbuch der deutschen Konnektoren*. (Bd. 13 der Reihe *Schriften des Instituts für Deutsche Sprache*). Berlin u.a.: de Gruyter, 902–962.
- Breindl, Eva/Walter, Maik (2011): Kausalverknüpfungen im Deutschen. Eine korpusbasierte Studie zum Zusammenspiel von Konnektorbedeutung, Kontexteigenschaften und Diskursrelationen. In: Konopka, Marek/Kubczak, Jacqueline/Mair, Christian/Štícha, František/Waßner, Ulrich H. (Hrsg.): *Grammatik und Korpora 2009. Dritte Internationale Konferenz*. Mannheim, 22.4.-24.9.2009. Tübingen: Narr, 503–512.
- Brinker, Klaus (1992): *Linguistische Textanalyse*. [1985]. Eine Einführung in Grundbegriffe und Methoden. 3., durchgesehene und erweiterte Auflage. Berlin: Erich Schmidt.
- Brisard, Frank (2002) (Hrsg.): *Grounding: the Epistemic Footing of Deixis and Reference*. Berlin/Boston: de Gruyter Mouton.
- Bubenhofer, Noah (2008): Diskurse berechnen? Wege zu einer korpuslinguistischen Diskursanalyse. In: Warnke, Ingo/Spitzmüller, Jürgen (Hrsg.): *Methoden der Diskurslinguistik. Sprachwissenschaftliche Zugänge zur transtextuellen Ebene*. Berlin, Boston: de Gruyter, 407–434.
- Bubenhofer, Noah (2009): *Sprachgebrauchsmuster. Korpuslinguistik als Methode der Diskurs- und Kulturanalyse*. Berlin/New York: de Gruyter. Online unter <http://www.bubenhofer.com/publikation.php?id=5> (zuletzt abgerufen am 13.6.2022)
- Bubenhofer, Noah/Scharloth, Joachim (2013). *Korpuslinguistische Diskursanalyse. Der Nutzen empirisch-quantitativer Verfahren*. In: Meinhof, Ulrike Hanna/Reisigl, Martin/Warnke, Ingo H.: *Diskurslinguistik im Spannungsfeld von Deskription und Kritik*. Berlin: Akademie, 147–168.
- Bubenhofer, Noah/Scharloth, Joachim (2015): Maschinelle Textanalyse im Zeichen von Big Data und Data-driven Turn – Überblick und Desiderate. *ZGL* 43, 1–26.

- Bubenhofer, Noah/Scharloth, Joachim (2016): Kulturwissenschaftliche Orientierung in der Computer- und Korpuslinguistik. In: Jäger, Ludwig/Holly, Werner/Krapp, Peter/Weber, Samuel/Heekeren, Simone (Hrsg.): Sprachwissenschaft als Kulturwissenschaft: Sprache – Kultur – Kommunikation/Language – Culture – Communication. (Handbücher zur Sprach- und Kommunikationswissenschaft, 43) Berlin/Boston: de Gruyter Mouton, 924–933.
- Bublitz, Hannelore (2010): Im Beichtstuhl der Medien. Die Produktion des Selbst im öffentlichen Bekenntnis. Bielefeld: transcript.
- Bublitz, Hannelore/Spreen, Dierk (2004): Architekturen einer Geschlechterkonstruktion. Der Potsdamer Platz aus der Perspektive der Gender Studies. In: Fischer, Joachim/Makropoulos, Michael (Hrsg.): Potsdamer Platz. Soziologische Theorien zu einem Ort der Moderne. München: Fink, 139–157.
- Bucher, Hans-Jürgen (2011): Multimodales Verstehen oder Rezeption als Interaktion. Theoretische und empirische Grundlagen einer systematischen Analyse der Multimodalität. In: Diekmannshenke, Hajo/Klemm, Michael/Stöckl, Hartmut (Hrsg.): Bildlinguistik. Theorien – Methoden – Fallbeispiele. Berlin: Erich Schmidt, 123–156.
- Bücker, Jörg (2012): Sprachhandeln und Sprachwissen: Grammatische Konstruktionen im Spannungsfeld von Interaktion und Kognition. Berlin/New York: de Gruyter.
- Bücker, Jörg (2015): Schema – Muster – Konstruktion. In: Dürscheid, Christa/Schneider, Jan Georg (Hrsg.): Satz, Äußerung, Schema. Berlin/Boston: de Gruyter Mouton, 445–463.
- Bührig, Kristin (2009): Konnektivpartikel. In: Hoffmann, Ludger (Hrsg.): Handbuch der deutschen Wortarten. Berlin, New York: de Gruyter, 525–546.
- Bührmann, Andrea D./Schneider, Werner (2008): Vom Diskurs zum Dispositiv: Eine Einführung in die Dispositivanalyse. Bielefeld: transcript.
- Burdick, Anne/Drucker, Johanna/Lunenfeld, Peter/Presner, Todd/Schnapp, Jeffrey (2012): Digital\_Humanities. Cambridge (Massachusetts), London: The MIT Press.
- Burger, Harald (2007): Phraseologie. Eine Einführung am Beispiel des Deutschen. 3., neu bearb. Aufl. Berlin: Erich Schmidt.
- Burger, Harald (2015): Phraseologie. Eine Einführung am Beispiel des Deutschen. 5., neu bearb. Aufl. Berlin: Erich Schmidt.
- Busse, Beatrix/Warnke, Ingo H. (2014): Ortsherstellung als sprachliche Praxis – sprachliche Praxis als Ortsherstellung. In: Dies. (Hrsg.): Place-Making in urbanen Diskursen. Berlin u.a.: de Gruyter, 1–7.
- Busse, Dietrich (2007): Diskurslinguistik als Kontextualisierung: Methodische Kriterien. Sprachwissenschaftliche Überlegungen zur Analyse gesellschaftlichen Wissens. In: Warnke, Ingo (Hrsg.): Diskurslinguistik nach Foucault. Theorie und Gegenstände. Berlin, New York: de Gruyter, 81–105.
- Busse, Dietrich (2008): Diskurslinguistik als Epistemologie – Das verstehensrelevante Wissen als Gegenstand linguistischer Forschung. In: Warnke, Ingo/Spitzmüller, Jürgen (Hrsg.): Methoden der Diskurslinguistik. Sprachwissenschaftliche Zugänge zur transtextuellen Ebene. Berlin, Boston: de Gruyter, 57–87.

- Busse, Dietrich (2012): *Framesemantik. Ein Kompendium*. Berlin, Boston: de Gruyter Mouton.
- Busse, Dietrich (2013): *Linguistische Diskurssemantik: Rückschau und Erläuterungen nach 30 Jahren*. In: Busse, Dietrich/Teubert, Wolfgang (Hrsg.): *Linguistische Diskursanalyse: neue Perspektiven. Interdisziplinäre Diskursforschung*. Wiesbaden: Springer, 31–53.
- Buttlar, Adrian von (2013): *Auf der Suche nach der Differenz: Minima Moralia reproduktiver Erinnerungsarchitektur*. In: Buttlar, Adrian von/Dolff-Bonekämper, Gabi/Falser, Michael S./Hubel, Achim/Mörsch, Georg (Hrsg.): *Denkmalpflege statt Attrappenkult. Gegen die Rekonstruktion von Baudenkmälern – eine Anthologie*. Gütersloh, Berlin: Bauverlag.
- Bybee, Joan L./Beckner, Clay (2010): *Usage-based Theory*. In: Narrog, Heiko/Heine, Bernd (Hrsg.): *The Oxford Handbook of Linguistic Analysis*. Oxford: Oxford University Press, 827–855.
- Conradi, Tobias/Ecker, Gisela/Eke, Norbert Otto/Muhle, Florian (2014): *Einleitung*. In: dies (Hrsg.): *Schemata und Praktiken*. München u.a.: Fink.
- Cunningham, Valentine (2002): *Zerbombte Städte – Die vorzeitigen Ruinen des Zweiten Weltkriegs*. In: Assmann, Aleida/Gomille, Monika/Rippl, Gabriele (Hrsg.): *Ruinenbilder*. München: Fink, 105–130.
- Czachur, Waldemar (2011): *Wie aus Wende, Umsturz und Mauerfall doch noch eine friedliche Revolution wurde – zur konzeptionellen und sprachlichen Kreativität im aktuellen Erinnerungsdiskurs in Deutschland*. In: Czachur, Waldemar/Czyżewska, Marta/Teichfischer, Philipp (Hrsg.): *Kreative Sprachpotenziale mit Stil entdecken. Germanistische Festschrift für Professor Wolfgang Schramm*. Wrocław: Oficyna Wydawnicza ATUT, 133–158.
- Czachur, Waldemar (2016): *Kollektives Gedächtnis und Sprache. Ein Beitrag zur Grammatik des deutschen Erinnerungsdiskurses über den Zweiten Weltkrieg*. In: Warakomska, Anna/Górajek, Anna/Jamiołkowski, Michał/Damińska-Wójcik, Anna (Hrsg.): *Dialog der Kulturen. Studien zur Literatur, Kultur und Geschichte. Festschrift für Professor Tomasz G. Pszczółkowski*. Warszawa: Instytut Germanistyki Uniwersytetu Warszawskiego, 419–430.
- Czicza, Dániel (2015): *Zu Analogien zwischen verbaler und nominaler Organisation*. In: Hennig, Mathilde/Niemann, Robert (Hrsg.): *Junktion in der Attribution. Ein Komplexitätsphänomen aus grammatischer, psycholinguistischer und praxistheoretischer Perspektive*. Berlin, Boston: de Gruyter Mouton, 123–162.
- Dahl, Östen (2004): *The Growth and Maintenance of Linguistic Complexity*. Amsterdam/Philadelphia: Benjamins.
- Dalmas, Martine/Dobrovol'skij, Dimitrij/Goldhahn, Dirk/Quasthoff, Uwe (2015): *Bewertung durch Adjektive. Ansätze einer korpusgestützten Untersuchung zur Synonymie*. In: LiLi 45 (177), 12–29.
- Dang-Anh, Mark/Rüdiger, Jan Oliver (2015): *From Frequency to Sequence: How Quantitative Methods Can Inform Qualitative Analysis of Digital Media Discourse*. In: *10plus1 – Living Linguistics* 1 (1), 57–73.
- De Certeau, Michel (1988): *Die Kunst des Handelns*. Berlin: Merve.
- Deutsche Forschungsgemeinschaft (DFG) (Hrsg.) (2019): *Handreichung: Informationen zu rechtlichen Aspekten bei der Handhabung von Sprachkorpora*. Online unter:

- [https://www.dfg.de/download/pdf/foerderung/grundlagen\\_dfg\\_foerderung/informationen\\_fachwissenschaften/geisteswissenschaften/standards\\_sprachkorpora.pdf](https://www.dfg.de/download/pdf/foerderung/grundlagen_dfg_foerderung/informationen_fachwissenschaften/geisteswissenschaften/standards_sprachkorpora.pdf) (zuletzt abgerufen am 19.03.2020)
- Diewald, Gabriele (1999): Die Modalverben im Deutschen. Grammatikalisierung und Polyfunktionalität. Tübingen: Niemeyer.
- Diewald, Gabriele (2005): Werden & Infinitiv – Versuch einer Zwischenbilanz nebst Ausblick. In: Deutsch als Fremdsprache 42, 23–32.
- Diewald, Gabriele (2009): Konstruktionen und Paradigmen. ZGL 37, 445–486.
- Dik, Simon C. (1997): The Theory of Functional Grammar. Part 2: Complex and Derived Constructions (Hrsg. v. Hengeveld, Kees). Berlin, Boston: de Gruyter Mouton.
- Dimbath, Oliver/Heinlein, Michael (Hrsg.) (2014): Sozialität des Erinnerns. Beiträge zur Arbeit an einer Theorie des sozialen Gedächtnisses. Wiesbaden: Springer.
- Dobrovolskij, Dmitrij (2011): Phraseologie und Konstruktionsgrammatik. In: Lasch, Alexander/Ziem, Alexander (Hrsg.): Konstruktionsgrammatik III. Aktuelle Fragen und Lösungsansätze. Tübingen: Stauffenburg, 111–130.
- Domke, Christine (2014): Die Betextung des öffentlichen Raumes: eine Studie zur Spezifik von Meso-Kommunikation am Beispiel von Bahnhöfen, Innenstädten und Flughäfen. Heidelberg: Winter.
- Dreesen, Philipp/Kumięga, Łukasz/Spieß, Constanze (Hrsg.) (2012): Mediendiskursanalyse. Diskurse – Dispositive – Medien – Macht. Wiesbaden: Springer.
- Dudenredaktion (Hrsg.) (2005): Duden. Grammatik der deutschen Gegenwartssprache. Bd. 4. 7. Aufl. Mannheim: Dudenverlag.
- Dudenredaktion (Hrsg.) (2009): Duden. Grammatik der deutschen Gegenwartssprache. Bd. 4. 8. Aufl. Mannheim: Dudenverlag.
- Dudenredaktion (Hrsg.) (2016): Duden. Grammatik der deutschen Gegenwartssprache. 9., vollständig überarbeitete und aktualisierte Auflage. Berlin: Dudenverlag.
- Durth, Werner/Sigel, Paul (2009): Baukultur. Spiegel gesellschaftlichen Wandels. Berlin: Jovis.
- Ehlich, Konrad (1997): „..., LTI, LQI, ...“ – Von der Unschuld der Sprache und der Schuld der Sprechenden. In: Kämper, Heidrun/Schmidt, Hartmut (Hrsg.) (1998): Das 20. Jahrhundert. Sprachgeschichte – Zeitgeschichte. IDS Jahrbuch 1997. Berlin, New York: de Gruyter, 275–303.
- Eisenberg, Peter (2013): Grundriss der deutschen Grammatik. Bd. 2: Der Satz. 4. Aufl. Stuttgart: Metzler.
- Eitz, Thorsten (2010a): Dossier Sprache und Politik. Belastete Wörter. Bundeszentrale für politische Bildung. Online unter: <http://www.bpb.de/politik/grundfragen/sprache-und-politik/42742/belastete-woerter> (zuletzt abgerufen am 19.03.2020)
- Eitz, Thorsten (2010b): Dossier Sprache und Politik. Zehn Stigmavokabeln. Bundeszentrale für politische Bildung. Online unter: <http://www.bpb.de/politik/grundfragen/sprache-und-politik/42744/stigmavokabeln?p=all> (zuletzt abgerufen am 19.03.2020)
- Eitz, Thorsten/Stötzel, Georg (2007): Wörterbuch der „Vergangenheitsbewältigung“: die NS-Vergangenheit im öffentlichen Sprachgebrauch. Bd. 1. Darmstadt: Wiss. Buchges.

- Eitz, Thorsten/Stötzel, Georg (2009): Wörterbuch der „Vergangenheitsbewältigung“: die NS-Vergangenheit im öffentlichen Sprachgebrauch. Bd. 2. Darmstadt: Wiss. Buchges.
- Emden, Christian J. (2002): Walter Benjamins Ruinen der Geschichte. In: Assmann, Aleida/Gomille, Monika/Rippl, Gabriele (Hrsg.): Ruinenbilder. München: Fink, 61–88.
- Engelberg, Stefan/Holler, Anke/Proost, Kristel (2011): Zwischenräume. Phänomene, Methoden und Modellierung im Bereich zwischen Lexikon und Grammatik. In: Engelberg, Stefan/Holler, Anke/Proost, Kristel (Hrsg.): Sprachliches Wissen zwischen Lexikon und Grammatik. Berlin, Boston: de Gruyter, 1–34.
- Erdheim, Mario (1994): Das Unbewußte in der Geschichte. In: ders.: Psychoanalyse und Unbewußtheit in der Kultur. Aufsätze 1980–1987. 3. Aufl. Frankfurt a.M.: Suhrkamp, 169–177.
- Erenz, Benedikt (2016): Schrecklich gut gemeint – Wie schwierig es ist, mit Tafeln und Mahnmalen über die NS-Zeit aufzuklären. Sechs traurige Beispiele. In: Die Zeit 20/2016.
- Erl, Astrid (2011): Kollektives Gedächtnis und Erinnerungskulturen. Eine Einführung. 2. Auflage. Stuttgart/Weimar: Metzler.
- Eroms, Hans-Werner (1986): Funktionale Satzperspektive. Tübingen: Niemeyer.
- Esposito, Elena (2002): Soziales Vergessen. Formen und Medien des Gedächtnisses der Gesellschaft. Frankfurt a.M.: Suhrkamp.
- Fabricsius-Hansen, Cathrine (2000): Formen der Konnexion. In: Brinker, Klaus et al. (Hrsg.): Gesprächs- und Textlinguistik. Berlin, New York: de Gruyter (Handbücher zur Sprach- und Kommunikationswissenschaft, 16.1), 331–342.
- Fabricsius-Hansen, Cathrine (2007): Unnötige Modifikationen? Nicht-restriktive vorangestellte Attribute im Diskurs. In: Redder, Angelika (Hrsg.): Diskurse und Texte. Festschrift für Konrad Ehlich zum 65. Geburtstag. Tübingen: Stauffenburg.
- Fabricsius-Hansen, Cathrine (2009): Subjunktio. In: Hoffmann, Ludger (Hrsg.): Handbuch der deutschen Wortarten. Berlin, New York: de Gruyter, 759–790.
- Fabricsius-Hansen, Cathrine (2011): Was wird verknüpft, mit welchen Mitteln – und wozu? Zur Mehrdimensionalität der Satzverknüpfung. In: Breindl, Eva/Ferraresi, Gisella/Volodina, Anna (Hrsg.): Satzverknüpfungen. Zur Interaktion von Form, Bedeutung und Diskursfunktion. Berlin, Boston: de Gruyter, 15–40.
- Fairclough, Norman/Wodak, Ruth (1997): Critical Discourse Analysis. In: Van Dijk, Teun A. (Hrsg.): Discourse as Social Interaction: Discourse Studies: A Multidisciplinary Introduction. Vol. 2. Thousand Oaks, CA: Sage, 258–284.
- Fauconnier, Gilles/Turner, Mark (2002): The Way We Think. Conceptual Blending and the Mind's Hidden Complexities. New York: Basic Books.
- Feilke, Helmuth (1996): Sprache als soziale Gestalt. Ausdruck, Prägung und die Ordnung der sprachlichen Typik. Frankfurt a. M.: Suhrkamp.
- Feilke, Helmuth (2007): Syntaktische Aspekte der Phraseologie III: Construction Grammar und verwandte Ansätze. In: Burger, Harald et al. (Hrsg.): Phraseologie. Ein internationales Handbuch zeitgenössischer Forschung. Berlin, New York: de Gruyter (Handbücher zur Sprach- und Kommunikationswissenschaft, 28.1), 63–76.

- Feilke, Helmuth (2014): Sprache, Kultur und kommunikatives Gedächtnis. In: Benitt, Nora/Koch, Christopher/Müller, Katharina/Saage, Sven/Schüler, Lisa (Hrsg.): *Korpus – Kommunikation – Kultur: Ansätze und Konzepte einer kulturwissenschaftlichen Linguistik*. Trier: WVT, 87–108.
- Feilke, Helmuth/Linke, Angelika (2009): Oberfläche und Performanz – Zur Einleitung. In: Linke, Angelika/Feilke, Helmuth (Hrsg.): *Oberfläche und Performanz. Untersuchungen zur Sprache als dynamischer Gestalt*. Berlin, Boston: Niemeyer, 3–18.
- Felder, Ekkehard (2012): Pragma-semiotische Textarbeit und der hermeneutische Nutzen von Korpusanalysen für die linguistische Mediendiskursanalyse. In: ders. (Hrsg.): *Korpuspragmatik: thematische Korpora als Basis diskurslinguistischer Analysen*. Berlin, Boston: de Gruyter, 115–174.
- Felder, Ekkehard (2015): Lexik und Grammatik der Agonalität in der linguistischen Diskursanalyse. In: Kämper, Heidrun/Warneke, Ingo H. (Hrsg.): *Diskurs – interdisziplinär. Zugänge, Gegenstände, Perspektiven*. Berlin, Boston: de Gruyter, 87–120.
- Filatkina, Natalia (2007): Pragmatische Beschreibungsansätze. In: Burger, Harald et al. (Hrsg.): *Phraseologie. Ein internationales Handbuch zeitgenössischer Forschung*. Berlin, New York: de Gruyter (Handbücher zur Sprach- und Kommunikationswissenschaft, 28.1), 132–158.
- Fillmore, Charles J. (1977): Scenes-and-frames Semantics. In: Zampolli, Antonio (Hrsg.): *Linguistic Structures Processing*. Vol. 5. Amsterdam, New York, Oxford: North Holland, 55–81.
- Fink-Eitel, Hinrich (1992): Michel Foucault zur Einführung. 2. Aufl. Hamburg: Junius.
- Foucault, Michel (1978): *Dispositive der Macht. Über Sexualität, Wissen und Wahrheit*. Berlin: Merve.
- Foucault, Michel (1981): *Archäologie des Wissens*. Frankfurt a. M.: Suhrkamp.
- Fraas, Claudia/Meier, Stefan (2011): Multimodalität und Frame. Skizze einer Online-Diskursanalyse. In: *Mitteilungen des Deutschen Germanistenverbandes*, Bd. 58, 3. Göttingen: Vandenhoeck & Ruprecht, 238–249.
- Fraas, Claudia/Pentzold, Christian (2015): Big Data vs. Slow Understanding?. Voraussetzungen und Vorgehen computerunterstützter Analyse transmedialer multimodaler Diskurse. *ZGL* 43.1, 112–133.
- Frei, Norbert (2009): *1945 und wir. Das Dritte Reich im Bewußtsein der Deutschen*. München: Dt. Taschenbuch-Verl.
- Freud, Sigmund (2000/1900): *Die Traumdeutung* (1900). Studienausgabe. Bd. II. Frankfurt a. M.: Fischer.
- Freud, Sigmund (2000): *Konstruktionen in der Analyse* (1937). In: ders.: *Schriften zur Behandlungstechnik*. Studienausgabe. Ergänzungsband. Frankfurt a. M.: Fischer, 393–406.
- Fricke, Ellen (2012): *Grammatik multimodal: Wie Wörter und Gesten zusammenwirken*. Berlin/Boston: de Gruyter.
- Friedmann, John (2007): Reflections on Place and Place-making in the Cities of China. *International Journal of Urban and Regional Research*. Vol. 31.2, 157–179.

- Fritz, Thomas A. (2000): *Wahr-Sagen. Futur, Modalität und Sprecherbezug im Deutschen*. Hamburg: Buske.
- Fuhrhop, Nanna/Thieroff, Rolf (2005): Was ist ein Attribut? ZGL 33, 306–342.
- Gehrke, Hans-Joachim/Sénécheau, Miriam (2010) (Hrsg.): *Geschichte, Archäologie, Öffentlichkeit. Für einen neuen Dialog zwischen Wissenschaft und Medien. Standpunkte aus Forschung und Praxis*. Bielefeld: transcript.
- Gerhard, Ute (2004): Rolle. In: Ammon, Ulrich/Dittmar, Norbert/Mattheier, Klaus J./Trudgill, Peter (Hrsg.): *Soziolinguistik*. 2. Aufl. Berlin, New York: de Gruyter (= Handbücher zur Sprach- und Kommunikationswissenschaft 3.1), 384–391.
- Gese, Helga/Hohaus, Vera (2012): „Der Stadtring ist befahrener als die Autobahn“: Bemerkungen zur Gradierbarkeit beim Zustandspassiv. In: Rothstein, Björn (Hrsg.): *Nicht-flektierende Wortarten*. Berlin, Boston: de Gruyter, 275–299.
- Glaserapp, Gabriele von (2006): Von der „Endlösung der Judenfrage“ zum Holocaust. Über den sprachlichen Umgang mit der deutschen Vergangenheit. In: Felder, Ekkehard (Hrsg.): *Semantische Kämpfe. Macht und Sprache in den Wissenschaften*. Berlin, Boston: de Gruyter, 127–156.
- Gloning, Thomas (2001): Gebrauchsweise von Modalverben in Texttraditionen. In: Müller, Reimar/Reis, Marga (Hrsg.): *Modalität und Modalverben im Deutschen*. Hamburg: Buske, 177–200.
- Göderitz, Johannes/Rainer, Roland/Hoffman, Hubert (1957): Die gegliederte und aufgelockerte Stadt. In: Lambugnani, Vittorio Magnago/Frey, Katia/Perotti, Eliana (2005): *Anthologie zum Städtebau. Vom Wiederaufbau nach dem Zweiten Weltkrieg bis zur zeitgenössischen Stadt*. Bd. III. Berlin: Gebr. Mann Verlag, 79–85.
- Goertz, Hans-Jürgen (2007): Geschichte – Erfahrung und Wissenschaft. Zugänge zum historischen Erkenntnisprozess. In: ders. (Hrsg.): *Geschichte. Ein Grundkurs*. 3. Aufl. Hamburg, 19–47.
- Goffman, Erving (1979): Footing. In: *Semiotica* 25, 1–29.
- Goffman, Erving (1980): *Rahmen-Analyse. Ein Versuch über die Organisation von Alltagserfahrungen*. Frankfurt a.M.: Suhrkamp.
- Goldberg, Adele E. (1998): *Constructions: A construction grammar approach to argument structure*. University of Chicago Press.
- Göpferich, Susanne (2007): Kürze als Prinzip fachsprachlicher Kommunikation. In: Bär, Jochen A./Roelcke, Thorsten/Steinhauer, Anja (Hrsg.): *Sprachliche Kürze. Konzeptuelle, strukturelle und pragmatische Aspekte*. Berlin, Boston: de Gruyter, 412–433.
- Göttlich, Udo/Winter, Rainer (2004): Postfordistische Artikulationen von Stadtarchitektur, Konsum und Medien: der Potsdamer Platz aus der Perspektive der Cultural Studies. In: Fischer, Joachim/Makropoulos, Michael (Hrsg.): *Potsdamer Platz. Soziologische Theorien zu einem Ort der Moderne*. München: Fink, 81–105.
- Gries, Stefan T./Stefanowitsch, Anatol (2004): Extending collostructional analysis: A corpus-based perspective on „alternations.“ *International Journal of Corpus Linguistics*, 9(1), 97–129.



- Große Kracht, Klaus (2010): Debatte: Der Historikerstreit. In: Docupedia-Zeitgeschichte. Online unter [http://docupedia.de/zg/kracht\\_historikerstreit\\_v1\\_de\\_2010](http://docupedia.de/zg/kracht_historikerstreit_v1_de_2010) (zuletzt abgerufen am 07.02.2018)
- Großklaus, Götz (2007): Das zerstörte Gesicht der Städte. „Konkurrierende Gedächtnisse“ im Nachkriegsdeutschland (West) 1945–1960. In: Böhn, Andreas/Mielke, Christine (Hrsg.) (2016): Die zerstörte Stadt. Mediale Repräsentationen urbaner Räume von Troja bis SimCity. Bielefeld: transcript, 101–124.
- Gülich, Elisabeth (2008): Alltägliches erzählen und alltägliches Erzählen. ZGL 36, 403–426.
- Gülich, Elisabeth/Hausendorf, Heiko (2000): Vertexungsmuster Narration. In: Brinker, Klaus/Antos, Gerd/Heinemann, Wolfgang/Sager, Sven F. (Hrsg.): Text- und Gesprächslinguistik. Ein internationales Handbuch zeitgenössischer Forschung. Berlin, New York: de Gruyter (= Handbücher zur Sprach- und Kommunikationswissenschaft 16.1), 369–385.
- Gumperz, John (1992): Contextualization revisited. In: Auer, Peter/Di Luzio, Aldo (Hrsg.): The Contextualization of Language. Amsterdam: John Benjamins Publishing Company, 39–53.
- Günthner, Susanne (2016): Praktiken erhöhter Dialogizität: onymische Anredeformen als Gesten personifizierter Zuwendung. ZGL 44, 406–436.
- Gutschow, Niels/Stiemer, Regine (1982): Dokumentation Wiederaufbau der Stadt Münster 1945–1961. Münster: Copenrath.
- Habscheid, Stephan (2000): Das „Mikro-Makro-Problem“ in der Gesprächsforschung. Gesprächsforschung 1 (2000), 125–148. Online unter: <http://www.gespraechsforschung-online.de/fileadmin/dateien/heft2000/ga-habscheid.pdf> (zuletzt abgerufen am 19.03.2020)
- Habscheid, Stephan und Nadine Reuther (2013): Performatisierung und Verräumlichung von Diskursen. Zur soziomateriellen Herstellung von ‚Sicherheit‘ an öffentlichen Orten. In: Felder, Ekkehard (Hrsg.): Faktizitätsherstellung in Diskursen: Die Macht des Deklarativen. Berlin/New York, 127–145.
- Halliday, Michael A.K. (1996): An Introduction to Functional Grammar. London: Arnold.
- Hammerstein, Katrin (2007): Deutsche Geschichtsbilder vom Nationalsozialismus. In: APuZ. Aus Politik und Zeitgeschichte 3/2007: Gemeinsame Nachkriegsgeschichte, 24–30. Online unter <http://www.bpb.de/apuz/30715/deutsche-geschichtsbilder-vom-nationalsozialismus?p=all> (zuletzt abgerufen am 19.03.2020)
- Hartwig, Wolfgang (1998): Formen der Geschichtsschreibung: Varianten des historischen Erzählens. In: Goertz, Hans-Jürgen (Hrsg.) (2007): Geschichte: Ein Grundkurs. Reinbek b. Hamburg: Rowohlt, 218–237.
- Haspelmath, Martin (2002): Grammatikalisierung: Von der Performanz zur Kompetenz ohne angeborene Grammatik. In: Krämer, Sybille/König, Ekkehard (Hrsg.): Gibt es eine Sprache hinter dem Sprechen? Frankfurt a. M.: Suhrkamp, 262–286.
- Haß-Zumkehr, Ulrike (1994): 50 Jahre Mahnmaltexte. Eine satzsemantische Analyse. In: Böke, Karin/Jung, Matthias/Wengeler, Martin (Hrsg.) (1996): Öffentlicher Sprachgebrauch – Praktische, theoretische und historische Perspektiven. Opladen: Westdeutscher Verlag, 301–314.

- Hausendorf, Heiko (2009): Kleine Texte – über Randerscheinungen von Textualität. In: Germanistik in der Schweiz. Online-Zeitschrift der Schweizerischen Akademischen Gesellschaft für Germanistik 6, 5–19. Online unter [www.sagg-zeitschrift.unibe.ch/6\\_09/hausendorf.pdf](http://www.sagg-zeitschrift.unibe.ch/6_09/hausendorf.pdf) (zuletzt abgerufen am 29.01.2018)
- Hausendorf, Heiko/Kesselheim, Wolfgang (2008): Textlinguistik fürs Examen. Göttingen: Vandenhoeck & Ruprecht.
- Hauser, Stefan (2014): Netze im Wandel – Wandel in Netzen. Diachrone Perspektiven auf die Vernetztheit von Textsorten. In: Ders./Kleinberger, Ulla/Roth, Kersten Sven (Hrsg.): Musterwandel – Sortenwandel: Aktuelle Tendenzen der diachronen Text(sorten)linguistik. Frankfurt a.M.: Peter Lang, 275–312.
- Hausmann, Franz Josef (1985): Kollokationen im deutschen Wörterbuch. Ein Beitrag zur Theorie des lexikographischen Beispiels. In: Bergenholtz, Henning und Joachim Mugdan (Hrsg.): Lexikographie und Grammatik Alten des Essener Kolloquiums zur Grammatik im Wörterbuch 28.-30.6.1984. Tübingen: Niemeyer, 118–129.
- Häußermann, Hartmut/Siebel, Walter (1987): Neue Urbanität. Frankfurt a. M.: Suhrkamp.
- Helbig, Gerhard (1997): Man-Konstruktionen und/oder Passiv? Deutsch als Fremdsprache 34, 82–85.
- Helbig, Gerhard (2003): Einige Bemerkungen zur Idee und zur Realisierung einer Textgrammatik. In: Thurmair, Maria/Willkop, Eva-Maria (Hrsg.): Am Anfang war das Wort. 10 Jahre „Textgrammatik der deutschen Sprache.“ München: ludicium, 19–32.
- Helbig, Gerhard/Buscha, Joachim (2005): Deutsche Grammatik. Ein Handbuch für den Ausländerunterricht. 5. Aufl. Berlin u.a.: Langenscheidt, 143–168.
- Hennig, Mathilde (2015): Strukturelle Komplexität attributiver Junktion. In: Dies./Niemann, Robert (Hrsg.): Junktion in der Attribution. Ein Komplexitätsphänomen aus grammatischer, psycholinguistischer und praxistheoretischer Perspektive. Berlin/Boston: de Gruyter, 163–202.
- Hennig, Mathilde/Niemann, Robert (2013): Unpersönliches Schreiben in der Wissenschaft: Eine Bestandsaufnahme. InfoDaF 40, 439–455.
- Herbst, Thomas (2011): Choosing *sandy beaches* – collocations, probabemes and the idiom principle. In: Herbst, Thomas/Faulhaber, Susen/Uhrig, Peter (Hrsg.): The Phraseological View of Language. A Tribute to John Sinclair. Berlin, Boston: de Gruyter Mouton, 27–58.
- Hermanns, Fritz (1994): Schlüssel-, Schlag- und Fahnenwörter. Zur Begrifflichkeit und Theorie der lexikalischen „politischen Semantik“. Arbeiten aus dem Sonderforschungsbereich 245 „Sprache und Situation“. Heidelberg, Mannheim: Universität Heidelberg. Bericht Nr. 81.
- Hoberg, Rudolf (2015): Holocaust, Schoah, Pogrom – Über die sprachliche Distanzierung vom Grauen. In: Der Sprachdienst 59, 12–15.
- Hoey, Michael (2007): Grammatical Creativity. In: Hoey, Michael/Mahlberg, Michaela/Stubbs, Michael/Teubert, Wolfgang (Hrsg.): Text, Discourse and Corpora. Theory and Analysis. With an introduction by John Sinclair. London, New York: Continuum, 31–56.
- Holl, Daniel (2010): Studia Grammatica. Modale Infinitive und dispositionelle Modalität im Deutschen. Berlin: Akademie Verlag.

- Holly, Werner (2009): Der Wort-Bild-Reißverschluss. Über die performative Dynamik audiovisueller Transkriptivität. In: Linke, Angelika/Feilke, Helmut (Hrsg.): Oberfläche und Performanz. Untersuchungen zur Sprache als dynamischer Gestalt. Tübingen: Niemeyer, 389–406.
- Hözlner, Matthias (2006): Empirisch fundierte Überlegungen zur Substantivvalenz. In: Sprachwissenschaft 31, 159–174.
- Hopper, Paul J. (1987): Emergent Grammar. In: Annual Meeting of the Berkeley Linguistics Society, 13, 139–157. Online unter <https://journals.linguisticsociety.org/proceedings/index.php/BLS/article/view/1834/1606> (zuletzt abgerufen am 19.03.2020)
- Hopper, Paul J. (2004): The openness of grammatical constructions. In: Chicago Linguistic Society 40, 239–256.
- Hundt, Markus (2003): Zum Verhältnis von epistemischer und nicht-epistemischer Modalität im Deutschen. ZGL 31, 343–381.
- Imo, Wolfgang (2011): Die Grenzen von Konstruktionen: Versuch einer granularen Neubestimmung des Konstruktionsbegriffs der Construction Grammar. In: Engelberg, Stefan/Holler, Anke/Proost, Kristel (Hrsg.): Sprachliches Wissen zwischen Lexikon und Grammatik. Berlin, Boston: de Gruyter, 113–148.
- Imo, Wolfgang (2015): Was ist (k)eine Konstruktion? In: Dürscheid, Christa/Schneider, Jan Georg (Hrsg.): Satz, Äußerung, Schema. Berlin, Boston: de Gruyter Mouton, 551–576.
- Imo, Wolfgang (2015): „Schnittmuster“ in der Interaktion: Adressatenzuschnitt, Situationszuschnitt, Gattungszuschnitt. Arbeitspapierreihe Spln (Sprache und Interaktion). Online unter: <http://arbeitspapiere.sprache-interaktion.de/arbeitspapiere/arbeitspapier50.pdf> (zuletzt abgerufen am 19.03.2020)
- Imo, Wolfgang (2017): Diskursmarker im gesprochenen und geschriebenen Deutsch. In: Blühdorn, Hardarik/Deppermann, Arnulf/Helmer, Henrike/Spranz-Fogasy, Thomas (Hrsg.): Diskursmarker im Deutschen. Reflexionen und Analysen. Göttingen: Verlag für Gesprächsforschung, 49–72.
- Institut für Deutsche Sprache (IDS) (2007): Korpusbasierte Wortgrundformenliste DeReWo. v-30000g-2007-12-31-0.1. Online unter <http://www1.ids-mannheim.de/fileadmin/kl/derewo/derewo-v-30000g-2007-12-31-0.1.zip> (zuletzt abgerufen am 19.03.2020)
- Jäger, Ludwig (2004): Transkription – zu einem medialen Verfahren an den Schnittstellen des kulturellen Gedächtnisses. TRANS. Internet-Zeitschrift für Kulturwissenschaften 15. Online unter: [http://www.inst.at/trans/15Nr/06\\_2/jaeger15.htm](http://www.inst.at/trans/15Nr/06_2/jaeger15.htm) (zuletzt abgerufen am 19.03.2020)
- Jäger, Ludwig (2006): Gedächtnis als Verfahren. Zur transkriptiven Logik der Erinnerung. In: Wodianska, Stefanie/Rieger, Dietmar (Hrsg.): Mythosaktualisierungen. Tradierungs- und Generierungspotentiale einer alten Erinnerungsform. Berlin/New York.
- Jäger, Margarete/Jäger, Siegfried (2007): Deutungskämpfe. Theorie und Praxis Kritischer Diskursanalyse. Wiesbaden: Westdeutscher Verlag.

- Jäger, Siegfried (1999): *Kritische Diskursanalyse: Eine Einführung*. 2. überarbeitete und erweiterte Aufl. Duisburg: DISS.
- Jäger, Siegfried (2001): Diskurs und Wissen. Theoretische und methodische Aspekte einer Kritischen Diskurs- und Dispositivanalyse. In: Keller, Reiner/Hirsland, Andreas/Schneider, Werner/Viehöver, Willy (Hrsg.): *Handbuch Sozialwissenschaftliche Diskursanalyse*. Bd. I: Theorien und Methoden. Wiesbaden: Springer, 81–112.
- Jakobson, Roman (1960): Der Doppelcharakter der Sprache und die Polarität zwischen Metaphorik und Metonymik. In: Haverkamp, Anselm (Hrsg.) (1996): *Theorie der Metapher*. Darmstadt: Wissenschaftliche Buchgesellschaft, 163–174.
- Jakobson, Roman (1979): *Ausätze zur Linguistik und Poetik*. Herausgegeben und eingeleitet von Wolfgang Raible. Frankfurt a.M.: Ullstein.
- Jaspers, Karl (1946): *Die Schuldfrage*. Heidelberg: Lambert Schneider.
- Jewitt, Carey/Henriksen, Berit (2016): Social Semiotic Multimodality. In: Stöckl, Hartmut/Klug, Nina (Hrsg.): *Handbuch Sprache im multimodalen Kontext*. Berlin, New York: de Gruyter, 145–164.
- Jones, Christian/Waller, Daniel (2015): *Corpus Linguistics for Grammar: A Guide for Research*. London/New York: Routledge.
- Kaat, Roxana/Schaal, Gary S./Dumm, Sebastian (2015): New Visual Hermeneutics. *ZGL* 43, 27–51.
- Kämper, Heidrun (1997): Entnazifizierung – Sprachliche Existenzformen eines ethischen Konzepts. In: dies./Schmidt, Hartmut (Hrsg.): *Das 20. Jahrhundert. Sprachgeschichte – Zeitgeschichte*. IDS Jahrbuch 1997, 304–329.
- Kämper, Heidrun (2005): Der Schulddiskurs in der frühen Nachkriegszeit. Ein Beitrag zur Geschichte des sprachlichen Umbruchs nach 1945. Berlin, Boston: de Gruyter.
- Kämper, Heidrun (2007): Opfer – Täter – Nichttäter. Ein Wörterbuch zum Schulddiskurs 1945–1955. Berlin, Boston: de Gruyter.
- Kämper, Heidrun (2012): Aspekte des Demokratiediskurses der späten 1960er Jahre. Konstellationen – Kontexte – Konzepte. Berlin, Boston: de Gruyter.
- Kämper, Heidrun (2015): ‚Kollektives Gedächtnis‘ als Gegenstand einer integrierten Kulturanalyse. In: Kämper, Heidrun/Warneke, Ingo H. (Hrsg.): *Diskurs interdisziplinär. Zugänge, Gegenstände, Perspektiven*. Berlin, Boston: de Gruyter, 161–188.
- Keibel, Holger/Belica, Cyril/Kupietz, Marc/Perkuhn, Rainer (2011): Approaching grammar: Detecting, conceptualizing and generalizing paradigmatic variation. In: Konopka, Marek/Kubczak, Jacqueline/Mair, Christian/Štícha, František/Waßner, Ulrich H. (Hrsg.): *Grammatik und Korpora 2009. Dritte Internationale Konferenz*. Tübingen: Narr, 329–355.
- Kellerhoff, Sven Felix (2015): Kriegsende 1945. So zerstörten Bomben deutsche Städte – eine Bilanz. In: *Welt.de*. Online unter <https://www.welt.de/geschichte/zweiter-weltkrieg/article140674954/So-zerstoerten-Bomben-deutsche-Staedte-eine-Bilanz.html> (zuletzt abgerufen am 19.03.2020)
- Kesselheim, Wolfgang (2010): „Zeigen, erzählen und dazu gehen“: Die Stadtführung als raumbasierte kommunikative Gattung. In: Costa, Marcella/Müller-Jacquier, Bernd (Hrsg.):

- Deutschland als fremde Kultur: Vermittlungsverfahren in Touristenführungen. München: ludicum, 244–271.
- Kesselheim, Wolfgang/Hausendorf, Heiko (2008): Textlinguistik fürs Examen. Göttingen: Vandenhoeck & Ruprecht.
- Kettenacker, Lothar (Hrsg.) (2003): Ein Volk von Opfern? Die neue Debatte um den Bombenkrieg 1940–45. Berlin: Rowohlt.
- Kipfer, Stefan/Saberi, Parastou/Wieditz, Thorben (2012): Henri Lefebvre. In: Eckard, Frank (Hrsg.): Handbuch Stadtsoziologie. Wiesbaden: Springer, 167–183.
- Kirchmann, Kay (2007): Blicke auf Trümmer. Anmerkungen zur filmischen Wahrnehmungsorganisation der Ruinenlandschaften nach 1945. In: Böhn, Andreas/Mielke, Christine (Hrsg.): Die zerstörte Stadt. Mediale Repräsentationen urbaner Räume von Troja bis SimCity. Bielefeld: transcript, 273–287.
- Kleihues, Josef Paul (1993): Städtebau ist Erinnerung. In: Lambugnani, Vittorio Magnago/Frey, Katia/Perotti, Eliana (2005): Anthologie zum Städtebau. Vom Wiederaufbau nach dem Zweiten Weltkrieg bis zur zeitgenössischen Stadt. Bd. III. Berlin: Gebr. Mann Verlag, 314–334.
- Klein, Josef (1998): Linguistische Stereotypbegriffe. In: Heinemann, Margot (Hrsg.): Sprachliche und soziale Stereotype. Frankfurt a. M. u.a., 25–46.
- Klemperer, Viktor (1995): Ich will Zeugnis ablegen bis zum letzten – Tagebücher 1942–1945. Berlin: Aufbau Verlag.
- Klenke, Dietmar (2008): Diskurse zur Täter-Opfer-Problematik der beiden Weltkriege. Museumsdidaktische Annäherungen am Beispiel der nationalistischen Agitationsmusik von Walter Rein als Vertreter der Jugendmusikbewegung. In: Brebeck, Wulff E./Stambolis, Barbara (Hrsg.): Erinnerungsarbeit kontra Verklärung der NS-Zeit. Vom Umgang mit Tatornten, Gedenkorten und Kultorten, München: Müller-Straten, 56–75.
- Köller, Wilhelm (2014): Perspektivität und Sprache. Zur Struktur von Objektivierungsformen in Bildern, im Denken und in der Sprache. Berlin/New York: de Gruyter.
- Konerding, Klaus-Peter (1993): Frames und lexikalisches Bedeutungswissen. Tübingen: Niemeyer.
- Konerding, Klaus-Peter (2009): Diskurslinguistik – eine neue Teildisziplin. In: Felder, Ekkehard (Hrsg.): „Sprache“. Heidelberger Jahrbücher. Heidelberg: Springer, 155–177.
- Körner, Martin (2000): Zur Zerstörung von Städten durch die Stadtherrschaft, innere Unruhen und Kriege und zu den Problemen des Wiederaufbaus von der Antike bis zum Zweiten Weltkrieg. In: ders. (Hrsg.): Stadtzerstörung und Wiederaufbau. Bd. 2. Bern, Stuttgart, Wien: Paul Haupt, 11–43.
- Koschorke, Albrecht (2013): Wahrheit und Erfindung. Grundzüge einer Allgemeinen Erzähltheorie. 3. Auflage. Frankfurt a. M.: Fischer.
- Koselleck, Reinhart (1994): Nachwort. In: Beradt, Charlotte: Das Dritte Reich des Traums. Frankfurt a. M.: Suhrkamp, 117–132.
- Krajewski, Markus (2016): Bauformen des Gewissens: über Fassaden deutscher Nachkriegsarchitektur. Stuttgart: Alfred Kröner.

- Krajewski, Markus (2019): Bauformen des Gewissens. Architektur und Medien nach der Stunde Null. In: Bartz/Christina/Kaerlein, Timo/Miggelbrink, Monique u.a. (Hrsg.): *Gehäuse: Mediale Einkapselungen*. Paderborn: Fink, 151–180.
- Krämer, Sibylle (2008): Medien, Boten, Spuren. Wenig mehr als ein Literaturbericht. In: Münker, Stefan/Roesler, Alexander (Hrsg.): *Was ist ein Medium?* Frankfurt a. M.: Suhrkamp, 65–90.
- Kress, Gunther (2009): What is mode? In: Jewitt, Carey (Hrsg.): *The Routledge Handbook of Multimodal Analysis*. London: Routledge, 54–67.
- Krüger, Thomas/Walther, Monika (2007): Auswirkungen Innerstädtischer Shopping-Center. In: Wehrheim, Jan (Hrsg.): *Shopping Malls. Interdisziplinäre Betrachtungen eines neuen Raumtyps*. Wiesbaden: VS Verlag für Sozialwissenschaften, 191–208.
- Kumiega, Łukasz (2012): Medien im Spannungsfeld zwischen Diskurs und Dispositiv. In: Dreesen, Philipp/Kumięga, Łukasz/Spieß, Constanze (Hrsg.): *Mediendiskursanalyse. Diskurse – Dispositive – Medien – Macht*. Wiesbaden: Springer, 25–45.
- Lacan, Jacques (1973): *Schriften I*. Freiburg im Breisgau: Walter.
- Laplanche, Jean/Pontalis, Jean-Bertrand (1972): *Das Vokabular der Psychoanalyse*. Frankfurt a. M.: Suhrkamp.
- Lasch, Alexander (2014): „Das Fenster wirkt geschlossen.“ Überlegungen zu nonagentiven Konstruktionen des Deutschen aus konstruktionsgrammatischer Perspektive. In: Lasch, Alexander/Ziem, Alexander (Hrsg.): *Grammatik als Netzwerk aus Konstruktionen. Sprachwissen im Fokus der Konstruktionsgrammatik*. Berlin, Boston: de Gruyter Mouton, 65–95.
- Lasch, Alexander/Ziem, Alexander (2013): *Konstruktionsgrammatik. Konzepte und Grundlagen gebrauchsbasierter Ansätze*. Berlin/Boston: de Gruyter.
- Latour, Bruno (1996): Das moralische Gewicht eines Schlüsselanhängers. In: Latour, Bruno (Hrsg.): *Der Berliner Schlüssel. Erkundungen eines Liebhabers der Wissenschaften*. Berlin: Akademie, 53–61.
- Latour, Bruno (2006): Technik ist stabilisierte Gesellschaft. In: Bellinger, Andréa/Krieger, David J. (Hrsg.): *ANTHology. Ein einführendes Handbuch zur Akteur-Netzwerk-Theorie*. Bielefeld: transcript, 369–398.
- Leggewie, Claus (2009): Zur Einleitung: Von der Visualisierung zur Virtualisierung des Erinnerns. In: Meyer, Erik (Hrsg.): *Erinnerungskultur 2.0. Kommemorativ Kommunikation in digitalen Medien*. Frankfurt a. M., New York: Campus, 9–28.
- Lehmann, Christian (2007): Nexion – Complex sentences: Reduction of clauses. Online unter: [http://www.christianlehmann.eu/ling/lg\\_system/grammar/nexion/complex\\_index.php?open=reduction\\_of\\_clause](http://www.christianlehmann.eu/ling/lg_system/grammar/nexion/complex_index.php?open=reduction_of_clause) (zuletzt abgerufen am 19.03.2020)
- Letnes, Ole (2011): Über *werden* und *sollen* als modale und/oder evidentielle Marker. In: Diebold, Gabriele/Smirnova, Elena (Hrsg.): *Modalität und Evidentialität*. Trier: WVT, 109–124.
- Lewandowska, Anna (2008): Sprichwort-Gebrauch heute: Ein interkulturell-kontrastiver Vergleich von Sprichwörtern anhand polnischer und deutscher Printmedien. Frankfurt a. M. u.a.: Peter Lang.

- Liedtke, Frank (1996): Stereotypensemantik, Metapherntheorie und Illokutionsstruktur. Die Analyse politischer Leitvokabeln in linguistischer Perspektive. Politische Leitvokabeln in der Adenauer-Ära. Berlin, New York: de Gruyter (Sprache, Politik, Öffentlichkeit, 8), 1–18.
- Link, Jürgen (1983): Elementare Literatur und generative Diskursanalyse. München: Brill Fink.
- Link, Jürgen (2016): Sprache und Kultur in der foucaultschen Diskurstheorie. In: Jäger, Ludwig/Holly, Werner/Krapp, Peter/Weber, Samuel/Heekeren, Simone (Hrsg.): Sprachwissenschaft als Kulturwissenschaft: Sprache – Kultur – Kommunikation/Language – Culture – Communication. Berlin, Boston: de Gruyter Mouton (Handbücher zur Sprach- und Kommunikationswissenschaft, 43), 117–126.
- Linke, Angelika (2011): Signifikante Muster – Perspektiven einer kulturalistischen Linguistik. In: Wåghäll Nivre, Elisabeth/Kaute, Brigitte/Andersson, Bo/Landén, Barbro/Stoeva-Holm, Dessislava (Hrsg.): Begegnungen. Das VIII. Nordisch-Baltische Germanistentreffen in Sigtuna vom 11. bis zum 13. 6. 2009. (Acta Universitatis Stockholmiensis), Stockholm, 23–44.
- Linke, Angelika (2015): Entdeckungsprozeduren. Oder: Wie Diskurse auf sich aufmerksam machen. In: Kämper, Heidrun/Warke, Ingo H. (Hrsg.): Diskurs – interdisziplinär. Zugänge, Gegenstände, Perspektiven. Berlin/Boston: de Gruyter, 63–85.
- Lorenzer, Alfred (2000): Sprachzerstörung und Rekonstruktion. Vorarbeiten zu einer Metatheorie der Psychoanalyse. 5. Aufl., Frankfurt a. M.: Suhrkamp.
- Löw, Martina (2010): Soziologie der Städte. Frankfurt a. M.: Suhrkamp.
- Lüdicke, Lars (2016): Hitlers Weltanschauung. Von „Mein Kampf“ bis zum „Nero-Befehl“. Paderborn: Schöningh.
- Lüger, Heinz-Helmut (2004): Kollokationen – zwischen Arbitrarität und Kompositionalität. In: Pohl, Inge/Konerding, Klaus-Peter (Hrsg.): Stabilität und Flexibilität in der Semantik. Strukturelle, kognitive, pragmatische und historische Perspektiven. Frankfurt a. M. u.a.: Peter Lang, 45–66.
- Luger, Kurt (1994): Kulturerlebnis Stadt. In: Brandner, Birgit/Luger, Kurt/Mörth, Ingo (Hrsg.): Kulturerlebnis Stadt. Theoretische und praktische Aspekte der Stadtkultur. Wien: Picus, 14–50.
- Lüscher, Rudolf/Makropoulos, Michael (1982): Revolte für eine andere Stadt. In: Ästhetik und Kommunikation 49, 113–125.
- Maaß, Philipp (2015): Die moderne Rekonstruktion. Eine Emanzipation der Bürgerschaft in Architektur und Städtebau. Regensburg: Schnell & Steiner.
- Mahsarski, Dirk (2016): Die Förderung der Prähistorischen Archäologie durch die SS von 1933–1945. „Wir werden uns dieser Aufgabe mit derselben Zähigkeit widmen, mit der sich die Schutzstaffel allen anderen Aufgaben bisher gewidmet hat“. In: Grunwald, Susanne/Halle, Uta/Mahsarski, Dirk/Reichenbach, Karin (Hrsg.): Die Spur des Geldes in der Prähistorischen Archäologie. Mäzene – Förderer – Förderstrukturen. Bielefeld: transcript, 87–120.
- Mann, Thomas (1945): Deutsche Hörer! 55 Radiosendungen nach Deutschland. 2. Aufl. Stockholm: Bermann-Fischer Verlag.

- Marek, Katja (2010): *Rekonstruktion! Warum?* In: *Aus Politik und Zeitgeschichte Themenheft „Stadtentwicklung“*. APuZ 17, 21–32.
- Martinec, Radan/Salway, Andrew (2005): *A system for image–text relations in new (and old) media*. In: *Visual Communication* 4(3), 339–374.
- Mason, Oliver (2013): *Reconciling Phraseology And Grammar*. In: Bennett, Paul/Durrell, Martin/Scheible, Silke/Whitt, Richard J. (Hrsg.): *New Methods in Historical Corpora*. Tübingen: Narr, 357–372.
- Matzel, Klaus/Ulvestad, Bjarne (1982): *Futur I und futurisches Präsens*. In: *Sprachwissenschaft* 7, 283–328.
- Maye, Harun (2010): *Was ist eine Kulturtechnik?* *Zeitschrift für Medien- und Kulturforschung* 2010.1, 121–135.
- Meier, Hans-Rudolf (2006): *Stadtentwicklung zwischen Denkmalpflege und Geschichtsfiktion*. In: Sigel, Paul/Klein, Bruno (Hrsg.) (2006): *Konstruktionen urbaner Identität. Zitat und Rekonstruktion in Architektur und Städtebau der Gegenwart*. Berlin: Lukas, 161–174.
- Meier, Simon (2016): *Generische Konditionale und Faktizität*. In: Zhu, Jianhua/Zhao, Jin/Szurawitzki, Michael (Hrsg.): *Germanistik zwischen Tradition und Innovation. Akten des des XIII. IVG-Kongresses Shanghai 2015*. Bd. 3. Frankfurt a. M. u. a.: Peter Lang, 297–301.
- Metten, Thomas (2014): *Kulturwissenschaftliche Linguistik. Entwurf einer Medientheorie der Verständigung*. Berlin, Boston: de Gruyter Mouton.
- Mielke, Christine (2007): *Geisterstädte. Literarische Texte und Bilddokumentationen zur Städtebombardierung des Zweiten Weltkrieges und die Personifizierung des Urbanen*. In: Böhn, Andreas/Mielke, Christine (Hrsg.): *Die zerstörte Stadt. Mediale Repräsentationen urbaner Räume von Troja bis SimCity*. Bielefeld: transcript, 125–180.
- Mihailova, Antoaneta (1997): *Man wird hier gut bedient. Zur Analyse eines man-Passiv-Satzes*. In: *Deutsch als Fremdsprache* 34, 80–81.
- Mitscherlich, Alexander (1967): *Die Unwirtlichkeit unserer Städte. Anstiftung zum Unfrieden*. 4. Aufl. Frankfurt a. M.: Suhrkamp.
- Mitscherlich, Margarete (1987): *Erinnerungsarbeit. Zur Psychoanalyse der Unfähigkeit zu trauern*. Frankfurt a. M.: Fischer.
- Mitscherlich, Alexander/Mitscherlich, Margarete (1987): *Die Unfähigkeit zu trauern. Grundlagen kollektiven Verhaltens*. [1967] München, Zürich: Piper.
- Müller, Marcus (2007): *Geschichte – Kunst – Nation. Die sprachliche Konstituierung einer ‚deutschen‘ Kunstgeschichte aus diskursanalytischer Sicht*. Berlin, Boston: de Gruyter.
- Müller, Marcus (2012): *Vom Wort zur Gesellschaft: Kontexte in Korpora. Ein Beitrag zur Methodologie der Korpuspragmatik*. In: Felder, Ekkehard/Müller, Marcus/Vogel, Friedemann (Hrsg.): *Korpuspragmatik. Thematische Korpora als Basis diskurslinguistischer Analysen*. Berlin, Boston: de Gruyter, 33–82.
- Müller, Marcus (2013a): *Kritische Diskursgrammatik? Die korpuslinguistische Erforschung grammatischer Kontextualisierungshinweise als Graswurzelanalyse der Macht*. In: Meinhof, Ulrike Hanna/Reisigl, Martin/Warneke, Ingo H. (Hrsg.): *Diskurslinguistik im Spannungsfeld von Deskription und Kritik*. Berlin: Akademie, 121–146.



- Müller, Marcus (2013b): Wissenskonsstituierung in Mündlichkeit und Schriftlichkeit. In: Felder, Ekkehard (Hrsg.): Faktizitätsherstellung in Diskursen. Die Macht des Deklarativen. Berlin, Boston: de Gruyter, 99–123.
- Müller, Marcus (2015): Sprachliches Rollenverhalten. Korpuspragmatische Studien zu divergenten Kontextualisierungen in Mündlichkeit und Schriftlichkeit. Berlin, Boston: De Gruyter.
- Müller, Marcus (2016): Diskursgrammatik als Linguistik indexikalischer Ordnungen. In: Zhu, Jianhua/Zhao, Jin/Szurawitzki, Michael (Hrsg.): Germanistik zwischen Tradition und Innovation. Akten des XIII. IVG-Kongresses Shanghai 2015. Bd. 3. Frankfurt a. M. u. a.: Peter Lang, 303–307.
- Müller, Marcus (2018): Diskursgrammatik. In: Ingo H. Warnke (Hrsg.): Handbuch Diskurs (Handbücher Sprachwissen). Berlin, Boston: de Gruyter, 75–103.
- Müller-Mertens, Eckhard (2000): Berlins Zerstörung durch den Zweiten Weltkrieg und sein Wiederaufbau. In: Körner, Martin (Hrsg.): Stadtzerstörung und Wiederaufbau. Bd. 2. Bern, Stuttgart, Wien: Paul Haupt, 367–394.
- Nöth, Winfried (2000): Handbuch der Semiotik. 2., vollständig neu bearbeitete und erweiterte Aufl. Stuttgart/Weimar: Metzler.
- Oksa, Els (1973): Betrachtungen im Bereich des Passiv. In: Moser, Hugo (Hrsg.): Linguistische Studien IV: Festgabe für Paul Grebe zum 65. Geburtstag, Teil 2. Düsseldorf: Schwann, 165–173.
- Pasch, Renate/Brauß, Ursula/Breindl, Eva/Waßner, Ulrich Hermann (2003): Handbuch der deutschen Konnektoren 1. Linguistische Grundlagen der Beschreibung und syntaktische Merkmale der deutschen Satzverknüpfen (Konjunktionen, Satzadverbien und Partikeln). Berlin, Boston: de Gruyter Mouton.
- Pierce, Charles S. (1980): Collected Papers (CP). Vol. 5, Pragmatism and Pragmaticism/Vol. 6, Scientific Metaphysics. Cambridge/Mass: Belknap Press of Harvard University Press.
- Perkuhn, Rainer/Keibel, Holger/Kupietz, Marc (2012): Korpuslinguistik. Paderborn: Fink.
- Peyer, Ann (1997): Satzverknüpfung: syntaktische und textpragmatische Aspekte. Tübingen: Niemeyer.
- Pfänder, Stefan/Behrens, Heike/Auer, Peter/Jacob, Daniel/Kailuweit, Rolf/Konieczny, Lars/Kortmann, Bernd/Mair, Christian/Strube, Gerhard (2013): Erfahrung zählt. Frequenzeffekte in der Sprache – ein Werkstattbericht. ZGL 43, 169, 7–32.
- Pohl, Rolf (2016): Alexander Mitscherlich/Margarete Mitscherlich: Die Unfähigkeit zu trauern. Grundlagen kollektiven Verhaltens. In: Salzborn, Samuel (Hrsg.): Klassiker der Sozialwissenschaften. 100 Schlüsselwerke im Portrait. 2. Aufl. Wiesbaden: Springer, 254–258.
- Polenz, Peter von (1987): Funktionsverben, Funktionsverbgefüge und Verwandtes. Vorschläge zur satzsemantischen Lexikographie. ZGL 15, 169–189.
- Polenz, Peter von (2008): Deutsche Satzsemantik: Grundbegriffe des Zwischen-den-Zeilen-Lesens. 3. Aufl. Berlin, New York: de Gruyter.
- Pörksen, Uwe (2000): Visiotype. Die Welt der Zweiten Anschauung. In: Fix, Ulla/Wellmann, Hans (Hrsg.): Bild im Text – Text im Bild. Heidelberg: Winter: 191–202.

- Postone, Moishe (1980): Anti-Semitism and National Socialism: Notes on the German Reaction to „Holocaust“. In: *New German Critique* 19, 97–115.
- Raible, Wolfgang (2012): Bildschriftlichkeit. In: Krämer, Sybille/Cancik-Kirschbaum, Eva/Trotzke, Rainer (Hrsg.): *Schriftbildlichkeit: Wahrnehmbarkeit, Materialität und Operativität von Notationen*. Berlin, Boston: de Gruyter, 201–218.
- Rapp, Irene (1996): Zustand? Passiv? – Überlegungen zum sogenannten „Zustandspassiv“. *Zeitschrift für Sprachwissenschaft* 15, 231–265.
- Rapp, Irene (1997): Partizipien und semantische Struktur. Zu passivischen Konstruktionen mit dem 3. Status. Tübingen: Stauffenburg.
- Rapp, Irene (2015): Zur Distribution von infiniten Komplementsätzen im Deutschen. Fragen, Fakten und Faktoren. In: Engelberg, Stefan/Meliss, Meike/Proost, Kristel/Winkler, Edeltraud (Hrsg.): *Argumentstruktur zwischen Valenz und Konstruktion*. Tübingen: Narr, 177–200.
- Rapp, Irene/Wöllstein, Angelika (2013): Satzwertige *zu*-Infinitivkonstruktionen im Deutschen. In: Meibauer, Jörg/Steinbach, Markus/Altmann, Hans (Hrsg.): *Satztypen des Deutschen*. Berlin, Boston: de Gruyter, 338–355.
- Rauer, Valentin (2014): Das Über-Leben der Dinge. Ansätze einer materialen Gedächtnistheorie in Postkonfliktgesellschaften. In: Dimbath, Oliver/Heinlein, Michael (Hrsg.) (2014): *Sozialität des Erinnerns. Beiträge zur Arbeit an einer Theorie des sozialen Gedächtnisses*. Wiesbaden: Springer, 59–86.
- Redder, Angelika (2003): Partizipiale Ketten und autonome Partizipialkonstruktionen. In: Hoffmann, Ludger (Hrsg.): *Funktionale Syntax. Die pragmatische Perspektive*. Berlin, New York: de Gruyter, 155–188.
- Reis, Marga (2001): Bilden Modalverben im Deutschen eine syntaktische Klasse? In: Müller, Reimar/Reis, Marga (Hrsg.): *Modalität und Modalverben im Deutschen*. Hamburg: Buske, 287–318.
- Reisigl, Martin/ Warnke, Ingo H. (2016): Diskursbedeutung und Grammatik – Transtextuelle und gesprächsübergreifende Aspekte grammatischer Inventare. In: Zhu, Jianhua/Zhao, Jin/Szurawitzki, Michael (Hrsg.): *Germanistik zwischen Tradition und Innovation. Akten des XIII. IVG-Kongresses Shanghai 2015. Bd. 3*. Frankfurt a. M. u. a.: Peter Lang, 279–283.
- Rohlfing, Katharina (2013): *Frühkindliche Semantik*. Tübingen: Narr.
- Rolf, Eckard (2000): Textuelle Grundfunktionen. In: Brinker, Klaus/Antos, Gerd/Heinemann, Wolfgang/Sager, Sven F. (Hrsg.): *Text- und Gesprächslinguistik. Ein internationales Handbuch zeitgenössischer Forschung*. Berlin, New York: de Gruyter (Handbücher zur Sprach- und Kommunikationswissenschaft, 16.1), 422–435.
- Roth, Kersten Sven (2009): Diskurswissen – Aspekte seiner Typologie am Beispiel des Diskurses über Ostdeutschland. In: Antos, Gerd/Weber, Thilo (Hrsg.): *Typen von Wissen. Begriffliche Unterscheidung und Ausprägungen in der Praxis des Wissenstransfers*. Frankfurt a. M. u. a.: Peter Lang, 127–143.

- Roth, Kersten Sven (2015): Diskursrealisationen. Grundlegung und methodischer Umriss einer pragmatisch-interaktionalen Diskurssemantik. Berlin: Erich Schmidt.
- Roth, Tobias (2014): Wortverbindungen und Verbindungen von Wörtern. Lexikographische und distributionelle Aspekte kombinatorischer Begriffsbildung zwischen Syntax und Morphologie. Baseler Studien zur deutschen Sprache und Literatur. Tübingen: Francke.
- Rothenhöfer, Andreas (2008): 8. Mai – Sprache und Identität im Umbruch. *Ditura. Zeitschrift für Germanistische Sprach- und Literaturwissenschaft*, H. 4, 73–90.
- Rothenhöfer, Andreas (2010): Befreiung, Zusammenbruch und Schuld. Eine Untersuchung zur sprachlichen Konstruktion kollektiver Identität und (Un-)schuld anhand der Umbruchsbezeichnungen des 8. Mai 1945. In: Dutt, Carsten (Hrsg.): *Die Schuldfrage. Untersuchungen zur geistigen Situation der Nachkriegszeit*. Heidelberg: Manutius, 45–64.
- Rothenhöfer, Andreas (2014): Der Heidelberger Stadthallenstreit 2009 bis 2010 – Bürgerprotest als Einforderung kollaborativen Place-Makings. In: Warnke, Ingo H./Busse, Beatrix (Hrsg.): *Placemaking in urbanen Diskursen*. Berlin/New York: de Gruyter, 11–39.
- Rothenhöfer, Andreas (2015): Gefühle zwischen Pragmatik, Grammatik und Idiomatik. Ein Beitrag zur Methodologie einer emotiven Diskursgrammatik. In: Kämper, Heidrun/Warnke, Ingo H. (Hrsg.): *Diskurs – interdisziplinär. Zugänge, Gegenstände, Perspektiven*. Berlin/Boston: de Gruyter, S. 245–280.
- Rothstein, Björn (2007): *Tempus*. Heidelberg: Winter.
- Ruppenhofer, Josef/Ellsworth, Michael/Petruck, Miriam R. L./Johnson, Christopher R./Baker, Collin F./Scheffczyk, Jan (2016): *FrameNet II: Extended Theory and Practice*. Online unter <https://framenet2.icsi.berkeley.edu/docs/r1.7/book.pdf> (zuletzt abgerufen am 19.03.2020)
- Rüsen, Jörn (1996): Historische Sinnbildung durch Erzählen: Eine Argumentationsskizze zum narrativistischen Paradigma der Geschichtswissenschaft und der Geschichtsdidaktik im Blick auf nicht-narrative Faktoren. In: *Internationale Schulbuchforschung* 18, 501–543.
- Sandl, Marcus (2005): Historizität der Erinnerung/Reflexivität des Historischen. Die Herausforderung der Geschichtswissenschaft durch die kulturwissenschaftliche Gedächtnisforschung. In: Oesterle, Günther (Hrsg.): *Erinnerung, Gedächtnis, Wissen. Studien zur kulturwissenschaftlichen Gedächtnisforschung*. Göttingen: Vandenhoeck & Ruprecht, 89–120.
- Schäfers, Bernhard (2010): *Stadtsoziologie. Stadtentwicklung und Theorien – Grundlagen und Praxisfelder*. 2. überarbeitete und aktualisierte Aufl. Wiesbaden: Springer.
- Scharloth, Joachim (2005): Die Semantik der Kulturen. Diskurssemantische Grundfiguren als Kategorien einer linguistischen Kulturanalyse. In: Busse, Dietrich/Niehr, Thomas/Wengeler, Martin (Hrsg.): *Brisante Semantik. Neuere Konzepte und Forschungsergebnisse einer kulturwissenschaftlichen Linguistik*. Tübingen: Niemeyer, 133–148. Reprint 2011 bei de Gruyter.

- Scharloth, Joachim (2016): Praktiken modellieren: Dialogmodellierung als Methode der Interaktionalen Linguistik. In: Deppermann, Arnulf/Feilke, Helmuth/Linke, Angelika (Hrsg.): Sprachliche und kommunikative Praktiken. Berlin, Boston: de Gruyter, 311–336.
- Schläppi, Daniel (2013): Geschichte als Gemeinbesitz. Vom Umgang mit der Historie in korporativen Milieus. In: Lehmann, René/Öchsner, Florian/Sebal, Gerd (Hrsg.): Formen und Funktionen sozialen Erinnerns. Sozial- und kulturwissenschaftliche Analysen. Wiesbaden: Springer, 259–276.
- Schmid, Hans Ulrich (1997): „Die Universität XY ist bestrebt ... Die Vorlesung führt ein ...“ Überlegungen zu Metonymie und Subjektschub im Gegenwartsdeutschen. Sprachwissenschaft 22, 1–18.
- Schmidt-Brücken, Daniel (2016): Diskursgrammatische Aspekte von Ortsnamen im kolonialen Archiv. Beiträge zur Namenforschung 51, 431–469.
- Schmitt, Reinhold (1993): Kontextualisierung und Konversationsanalyse. Deutsche Sprache 21 (4), 326–354.
- Schmitz, Ulrich (2004): Sprache in modernen Medien. Einführung in Tatsachen und Theorien, Themen und Thesen. Berlin: Erich Schmidt.
- Schmitz-Berning, Cornelia (2007): Vokabular des Nationalsozialismus. 2., durchges. u. überarb. Aufl. Berlin, Boston: de Gruyter.
- Scholz, Ronny/Ziem, Alexander (2015): Das Vokabular im diskurshistorischen Vergleich: Skizze einer korpuslinguistischen Untersuchungsheuristik. In: Kämper, Heidrun/Warnke, Ingo H. (Hrsg.): Diskurs interdisziplinär. Zugänge, Gegenstände, Perspektiven. Berlin, Boston: de Gruyter, 281–313.
- Schulz-Schaeffer, Ingo (2000): Akteur-Netzwerk-Theorie. Zur Koevolution von Gesellschaft, Natur und Technik. In: Weyer, Johannes (Hrsg.): Soziale Netzwerke: Konzepte und Methoden der sozialwissenschaftlichen Netzwerkforschung. München, Wien: Oldenbourg, 187–209.
- Schumacher, Fritz (1982): Strömungen in deutscher Baukunst seit 1800. Braunschweig, Wiesbaden: Vieweg.
- Schuster, Britt-Marie (2010): Auf dem Weg zur Fachsprache. Sprachliche Professionalisierung in der psychiatrischen Schreibpraxis (1800–1939). Berlin, New York: de Gruyter.
- Sebal, W.G. (2013): Luftkrieg und Literatur. Mit einem Essay zu Alfred Andersch. 6. Aufl. [2001] Frankfurt a. M.: Fischer.
- Sennett, Richard (2008): Verfall und Ende des öffentlichen Lebens. Die Tyrannei der Intimität. Berlin: Berliner Taschenbuchverlag.
- Sinclair, John (1991): Corpus, Concordance, Collocation. Oxford: Oxford University Press.
- Sinclair, John (2004/2005): Trust the Text: Language, Corpus and Discourse. London/ New York: Routledge.
- Sinclair, John/ Jones, Susan/ Daley, Robert (2004): English Collocation Studies. The OSTI Report. London/New York: Continuum International Publish Group.
- Smirnova, Elena/Mortelmans, Tanja (2010): Funktionale Grammatik. Berlin/New York: de Gruyter.

- Spieß, Constanze (2008): Linguistische Diskursanalyse als Mehrebenenanalyse – Ein Vorschlag zur mehrdimensionalen Beschreibung von Diskursen aus forschungspraktischer Perspektive. In: Warnke, Ingo H./Spitzmüller, Jürgen (Hrsg.): Methoden der Diskurslinguistik. Sprachwissenschaftliche Zugänge zur transtextuellen Ebene. Berlin, Boston: de Gruyter, 237–260.
- Spieß, Constanze (2009): Wissenskonflikte im Diskurs. Zur diskursiven Funktion von Metaphern und Schlüsselwörtern im öffentlich-politischen Diskurs um die humane embryonale Stammzellforschung. In: Felder, Ekkehard/Müller, Marcus (Hrsg.): Wissen durch Sprache. Theorie, Praxis und Erkenntnisinteresse des Forschungsnetzwerks „Sprache und Wissen“. Berlin, New York: de Gruyter, 309–336.
- Spieß, Constanze (2011): Diskurshandlungen. Theorie und Methode linguistischer Diskursanalyse am Beispiel der Bioethikdebatte. Berlin, New York: de Gruyter.
- Spieß, Constanze (2012): Das Dispositiv als Erweiterungspostulat linguistischer Diskursanalyse – ein Vorschlag zur Analyse öffentlich-politischer Mediendiskurse. In: Dreesen, Philipp/Kumięga, Łukasz/Spieß, Constanze (Hrsg.): Mediendiskursanalyse. Diskurse – Dispositive – Medien – Macht. Wiesbaden: Springer, 77–111.
- Spitzmüller, Jürgen (2013): Graphische Variation als soziale Praxis. Eine soziolinguistische Theorie skripturaler ‚Sichtbarkeit‘. Berlin, New York: de Gruyter.
- Spitzmüller, Jürgen/Warnke, Ingo H. (2011): Diskurslinguistik. Eine Einführung in Theorien und Methoden der transtextuellen Sprachanalyse. Berlin, Boston: de Gruyter.
- Staffeldt, Sven (2011): In der Hand von Konstruktionen. Eine Fallstudie zu bestimmten Phraseologismen mit *in...Hand*. In: Lasch, Alexander/Ziem, Alexander (Hrsg.): Konstruktionsgrammatik III. Aktuelle Fragen und Lösungsansätze. Tübingen: Stauffenburg, 131–147.
- Stede, Manfred/Walter, Maik (2011): Zur Rolle der Verknüpfungsebene am Beispiel der Kausal-konnektoren. In: Breindl, Eva/Ferraresi, Gisella/Volodina, Anna (Hrsg.): Satzverknüpfungen. Zur Interaktion von Form, Bedeutung und Diskursfunktion. Berlin, New York: de Gruyter, 149–179.
- Stefanowitsch, Anatol/Gries, Stefan Th. (2009): 43. Corpora and grammar. In: Lüdeling, Anke, and Merja Kytö (Hrsg.): Corpus Linguistics: An international handbook. Berlin: de Gruyter Mouton, 933–952.
- Stegu, Martin (2000): Text oder Kontext. Zur Rolle von Fotos in Tageszeitungen. In: Fix, Ulla/Wellmann, Hans (Hrsg.): Bild im Text – Text und Bild. Heidelberg: Winter, 307–324.
- Steinseifer, Martin (2011): Die Typologisierung multimodaler Kommunikationsangebote – Am Beispiel der visuellen Aspekte seitenbasierter Dokumente. In: Habscheid, Stephan (Hrsg.): Textsorten, Handlungsmuster, Oberflächen. Linguistische Typologien der Kommunikation. Berlin, New York: de Gruyter, 164–189.
- Steyer, Kathrin (2012): Sprichwortstatus, Frequenz, Musterbildung. Parömiologische Fragen im Lichte korpusmethodischer Empirie. In: Steyer, Kathrin (Hrsg.): Sprichwörter multilingual: Theoretische, empirische und angewandte Aspekte der modernen Parömiologie. Tübingen: Narr, 287–314.
- Steyer, Kathrin (2013): Usuelle Wortverbindungen. Zentrale Muster des Sprachgebrauchs aus korpusanalytischer Sicht. Tübingen: Narr.

- Steyer, Kathrin/Brunner, Annelen (2009). Das UWV-Analysemodell: Eine korpusgesteuerte Methode zur linguistischen Systematisierung von Wortverbindungen. In: OPAL. Mannheim: Institut für deutsche Sprache. Online unter <http://pub.ids-mannheim.de/laufend/opal/pdf/opal2009-1.pdf> (zuletzt abgerufen am 19.03.2020)
- Stierle, Karlheinz (1979): Erfahrungen und narrative Form. Bemerkungen zu ihrem Zusammenhang in Fiktion und Historiografie. In: Jürgen Kocka und Thomas Nipperdey (Hrsg.): *Theorie und Erzählung in der Geschichte*. München, 85–118.
- Stöckl, Hartmut (2004): *Die Sprache im Bild – Das Bild in der Sprache. Zur Verknüpfung von Sprache und Bild im massenmedialen Text. Konzepte – Theorien – Analysemethoden*. Berlin, New York: de Gruyter.
- Stöckl, Hartmut (2010): Transkodierung und Metamorphose – Neue/Alte Aufgaben für eine medien- und kulturwissenschaftlich ausgerichtete Linguistik und Literaturwissenschaft: Zur Einführung. In: ders. (Hrsg.): *Mediale Transkodierungen. Metamorphosen zwischen Sprache, Bild und Ton (= Wissenschaft und Kunst 17)*, Heidelberg: Winter, 1–17.
- Stojić, Aneta, and Nataša Košuta (2012): Zur Abgrenzung von Mehrwortverbindungen/On the Classification of Compound Nouns and Expressions. *Zagreber germanistische Beiträge* 21.1, 359–373.
- Stötzel, Georg (1997): Geschichtliche Selbstinterpretation im öffentlichen Sprachgebrauch seit 1945. Der Befreiungsdiskurs zum 8. Mai. In: Kämper, Heidrun/Schmidt, Hartmut (Hrsg.): *Das 20. Jahrhundert Sprachgeschichte – Zeitgeschichte*. IDS Jahrbuch 1997, 250–274.
- Stötzel, Georg (2005): Das Projekt eines Wörterbuchs der „Vergangenheitsbewältigung“. In: Wengeler, Martin (Hrsg.): *Sprachgeschichte als Zeitgeschichte. Konzepte, Methoden und Forschungsergebnisse der Düsseldorfer Sprachgeschichtsschreibung für die Zeit nach 1945*. Hildesheim, New York: Olms, 399–409.
- Stubbs, Michael (2007): Quantitative data on multi-word sequences in English: the case of the word world. In: Hoey, Michael/Mahlberg, Michaela/Stubbs, Michael/Teubert, Wolfgang (Hrsg.): *Text, Discourse and Corpora. Theory and Analysis*. With an introduction by John Sinclair. London, New York: Continuum, 163–189.
- Stubbs, Michael (2011): A Tribute to John Mc Hardy Sinclair (14 June 1933 – 13 March 2007). In: Herbst, Thomas/Faulhaber, Susen/Uhrig, Peter (Hrsg.): *The Phraseological View of Language. A Tribute to John Sinclair*. Berlin, Boston: de Gruyter Mouton, 1–16.
- Stukenbrock, Anja (2013): Sprachliche Interaktion. In: Auer, Peter/Behrens, Heike (Hrsg.): *Sprachwissenschaft. Grammatik – Interaktion – Kognition*. Stuttgart: Metzler, 217–260.
- Stumpf, Sören/Kreuz, Christian D. (2016): Phraseologie und Diskurslinguistik – Schnittstellen, Fallbeispiele und Forschungsperspektiven. *Zeitschrift für angewandte Linguistik* 65, 1–36.
- Syring, Eberhard (2010): *Spuren im Stadtraum. Architektonische Formkonzepte. Bedingungen und Wandlungen am Beispiel der jüngeren Architekturgeschichte Bremens*. Online unter: [http://www.bzb-bremen.de/images/Dateien/vortraege/2010\\_Syring\\_Spuren\\_im\\_Stadtraum/2010\\_Spuren\\_im\\_Stadtraum.pdf](http://www.bzb-bremen.de/images/Dateien/vortraege/2010_Syring_Spuren_im_Stadtraum/2010_Spuren_im_Stadtraum.pdf) (zuletzt abgerufen am 19.03.2020)

- Szczepaniak, Renata (2015): Syntaktische Einheitenbildung – typologisch und diachron betrachtet. In: Dürscheid, Christa/Schneider, Jan Georg (Hrsg.): *Handbuch Satz, Äußerung, Schema*. Berlin, Boston: de Gruyter Mouton, 104–124.
- Teubert, Wolfgang (2013): Die Wirklichkeit des Diskurses. In: Busse, Dietrich/Teubert, Wolfgang (Hrsg.): *Linguistische Diskursanalyse: neue Perspektiven. Interdisziplinäre Diskursforschung*. Wiesbaden: Springer, 55–145.
- Thiel, Thomas (2014): Digital Humanities. Eine empirische Wende für die Geisteswissenschaften? In: FAZ online. Online unter: <http://www.faz.net/aktuell/feuilleton/forschung-und-lehre/digital-humanities-eine-empirische-wende-fuer-die-geisteswissenschaften-11830514.html> (zuletzt abgerufen am 19.03.2020)
- Thieroff, Rolf (1992): *Das finite Verb im Deutschen. Tempus – Modus – Distanz*. Tübingen: Narr.
- Tienken, Susanne (2015): Muster – kulturalanalytisch betrachtet. In: Dürscheid, Christa/Schneider, Jan Georg (Hrsg.): *Satz, Äußerung, Schema*. Berlin, Boston: de Gruyter Mouton, 465–484.
- Twickel, Christoph (2010): *Gentrifidingsbums oder Eine Stadt für alle*. Hamburg: Nautilus.
- Van Dijk, Teun A. (1997): *Discourse as interaction in Society*. In: Van Dijk, Teun A. (Hrsg.): *Discourse as Social Interaction. Discourse Studies: A Multidisciplinary Introduction*. Vol. 2. London u.a.: Sage, 1–37.
- Van Dijk, Teun A. (2008): *Discourse and Power*. Basingstoke: Palgrave Macmillan.
- Van Dijk, Teun A. (2015): 22. Critical Discourse Analysis. In: Tannen, Deborah/Hamilton, Heidi E./Schiffrin, Deborah (Hrsg.): *Handbook of Discourse Analysis*. Vol. 1. 2. Edition. Bloomsbury: Wiley, 466–485.
- Van Hoorn, Tanja (2016): *Naturgeschichte in der ästhetischen Moderne*. Max Ernst, Ernst Jünger, Ror Wolf, W.G. Sebald. Göttingen: Wallstein.
- Virtanen, Tuija (2009): Corpora and discourse analysis. In: Lüdeling, Anke/Kytö, Merja (Hrsg.) (2009): *Corpus Linguistics. An International Handbook*. Vol. 2. Berlin, Boston: de Gruyter Mouton (*Handbücher zur Sprach- und Kommunikationswissenschaft*, 29), 1043–1070.
- Vogel, Friedemann (2012): Das LDA-Toolkit. Korpuslinguistisches Analyseinstrument für kontrastive Diskurs- und Imageanalysen in Forschung und Lehre. *Zeitschrift für angewandte Linguistik* 57, 129–165.
- Volodina, Anna (2014): Kausale Konnektoren. In: Breindl, Eva/Volodina, Anna/Waßner, Ulrich H. (Hrsg.): *Handbuch der deutschen Konnektoren 2. Semantik der deutschen Satzverknüpfers*. Boston, New York: de Gruyter Mouton (*Schriften des Instituts für Deutsche Sprache* 13), 795–908.
- Warnke, Ingo H. (2009): Die sprachliche Konstituierung von geteiltem Wissen in Diskursen. In: Felder, Ekkehard/Müller, Marcus (Hrsg.): *Wissen durch Sprache: Theorie, Praxis und Erkenntnisinteresse des Forschungsnetzwerkes „Sprache und Wissen“*, Vol. 3. Berlin, Boston: de Gruyter, 113–140.
- Warnke, Ingo H. (2013a): Diskurs als Praxis und Arrangement – Zum Status von Konstruktion und Repräsentation in der Diskurslinguistik. In: Viehöver, Willy/Keller, Reiner/Schneider,

- Werner (Hrsg.): Diskurs – Sprache – Wissen. Interdisziplinäre Beiträge zum Verhältnis von Sprache und Wissen in der Diskursforschung. Wiesbaden: Springer, 97–117.
- Warnke, Ingo H. (2013b): Urbaner Diskurs und maskierter Protest – Intersektionale Feldperspektiven auf Gentrifizierungsdynamiken. In: Roth, Kersten Sven/Spiegel, Carmen (Hrsg.): Angewandte Diskurslinguistik. Felder, Probleme, Perspektiven. Berlin: Akademie, 189–221.
- Warnke, Ingo H./Spitzmüller, Jürgen (2008): Methoden und Methodologie der Diskurslinguistik – Grundlagen und Verfahren einer Sprachwissenschaft jenseits textueller Grenzen. In: dies. (Hrsg.): Methoden der Diskurslinguistik. Sprachwissenschaftliche Zugänge zur transtextuellen Ebene. Berlin, Boston: de Gruyter, 3–54.
- Warnke, Ingo H./Wildfeuer, Janina/Schmidt-Brücken, Daniel/Karg, Wolfram (2014): Diskursgrammatik als wissensanalytische Sprachwissenschaft. In: Benitt, Nora/Koch, Christopher/Müller, Katharina/Saage, Sven/Schüler, Lisa (Hrsg.): Korpus – Kommunikation – Kultur: Ansätze und Konzepte einer kulturwissenschaftlichen Linguistik. Trier: WVT, 67–85.
- Weber, Heike (2012): Urbanisierung und Umwelt: Ein Plädoyer für den Blick auf Materialitäten, Ressourcen und urbane „Metabolismen“. IMS. Informationen zur modernen Stadtgeschichte, 28–35.
- Weinrich, Harald (2007): Textgrammatik der deutschen Sprache. 4. Aufl. Hildesheim: Olms.
- Weizsäcker, Richard von (1985): Zum 40. Jahrestag der Beendigung des Krieges in Europa und der nationalsozialistischen Gewaltherrschaft. Ansprache des Bundespräsidenten Richard von Weizsäcker am 8. Mai 1985 in der Gedenkstunde im Plenarsaal des Deutschen Bundestages. Online unter:  
[http://www.bundespraesident.de/SharedDocs/Reden/DE/Richard-von-Weiz-saecker/Reden/1985/05/19850508\\_Rede.html;jsessionid=9B256ACED1CE35412C873993847DAE97.1\\_cid378](http://www.bundespraesident.de/SharedDocs/Reden/DE/Richard-von-Weiz-saecker/Reden/1985/05/19850508_Rede.html;jsessionid=9B256ACED1CE35412C873993847DAE97.1_cid378) (zuletzt abgerufen am 19.03.2020)
- Welke, Klaus (2005a): Deutsche Syntax funktional. Perspektiviertheit syntaktischer Strukturen. 2. bearb. Aufl. Tübingen: Stauffenburg.
- Welke, Klaus (2005b): Tempus im Deutschen: Rekonstruktion eines semantischen Systems. Berlin, Boston: de Gruyter.
- Welke, Klaus (2015): Passivanalyse in der Konstruktionsgrammatik. Eine Erwiderung auf Werner Abraham. Deutsche Sprache 43, 97–117.
- Welzer, Harald (2010): Dossier Geschichte und Erinnerung. Erinnerungskultur und Zukunftsgedächtnis. Bundeszentrale für politische Bildung. Online unter:  
<http://www.bpb.de/geschichte/zeitgeschichte/geschichte-und-erinnerung/39868/zukunftsgedaechtnis?p=all> (zuletzt abgerufen am 19.03.2020)
- Wengeler, Martin (2013): Argumentationsmuster und die Heterogenität gesellschaftlichen Wissens. Ein linguistischer Ansatz zur Analyse kollektiven Wissens am Beispiel des Mig-



- rationsdiskurses. In: Viehöver, Willy/Keller, Reiner/Schneider, Werner (Hrsg.): Diskurs – Sprache – Wissen. Interdisziplinäre Diskursforschung. Wiesbaden: Springer, 145–166.
- Wengeler, Martin (2015): Die Analyse von Argumentationsmustern als Beitrag zur „transtextuell orientierten Linguistik“. In: Kämper, Heidrun/Warneke, Ingo H. (Hrsg.): Diskurs interdisziplinär. Zugänge, Gegenstände, Perspektiven. Berlin, Boston: de Gruyter, 47–62.
- Wengeler, Martin/Ziem Alexander (2010): „Wirtschaftskrisen“ im Wandel der Zeit. Eine diskurslinguistische Pilotstudie zum Wandel von Argumentationsmustern und Metapherngebrauch. In: Landwehr, Achim (Hrsg.): Diskursiver Wandel. Wiesbaden: Springer, 335–354.
- Wilk, Nicole M. (2015): „Gebäude erzählen Geschichte(n)“. Medienlinguistische und diskursgrammatische Untersuchung zur multimodalen Herstellung historischer Stadt-Räume durch Schilder, Pulte, Stelen, Mobile Tagging und Apps. Networks: die Online-Schriftenreihe des Projekts mediensprache.net, Nr. 72. Hannover. Online unter: <http://www.mediensprache.net/network/network-72.pdf> (zuletzt abgerufen am 19.03.2020)
- Wilk, Nicole M. (2019a): Lokalisierung und Adressierung als Verfahren erinnerungskultureller „Raumzuschnitte“ in Kommunikationsangeboten zur Stadtgeschichte. Zeitschrift für Angewandte Linguistik. Bd. 70, H. 1, 105–138.
- Wilk, Nicole M. (2019b): „Das ist kein neuer kalter Krieg“ – Zum Zusammenhang von Metadiskurs und Standardbildung aus diskurslinguistischer Sicht. In: Müller, Martin/Neubert, Christoph (Hrsg.): Standardisierung und Naturalisierung. Paderborn: Fink, 109–127.
- Winkler, Hartmut (2002): Docuverse. Zur Medientheorie der Computer. München: Boer.
- Winkler, Hartmut (2004): Diskursökonomie: Versuch über die innere Ökonomie der Medien. Frankfurt a. M.: Suhrkamp.
- Winkler, Hartmut (2008): Basiswissen Medien. Frankfurt a. M.: Fischer.
- Winkler, Hartmut (2016): Prozessieren. Die dritte, vernachlässigte Medienfunktion. Paderborn: Fink.
- Winter, Renée (2014): Geschichtspolitiken und Fernsehen. Repräsentationen des Nationalsozialismus im frühen österreichischen TV (1955–1970). Bielefeld: transcript.
- Winthrop-Young, Geoffrey (2013): Cultural Techniques: Preliminary Remarks. In: Theory, Culture & Society 30, 3–19.
- Wodak, Ruth (2002): Aspects of Critical Discourse Analysis. Zeitschrift für Angewandte Linguistik (ZfAL) 36, 5–31.
- Wöllstein, Angelika (2005): Nicht-Referenzialität – Die kongruierende semantische Eigenschaft bei um und zu. In: Marillier, Jean-Francois/Rozier, Claire (Hrsg.): Der Infinitiv im Deutschen. Tübingen: Stauffenburg, 47–64.
- Wuliger, Michael (2016): Beim Namen nennen. Geben wir dem Wort „Jude“ seinen stolzen Klang zurück. Jüdische Allgemeine. Online unter: <http://www.juedische-allgemeine.de/article/view/id/27079> (zuletzt abgerufen am 19.03.2020)
- Wygotski, Lew (1987): Ausgewählte Schriften Bd. 2: Arbeiten zur psychischen Entwicklung der Persönlichkeit. Köln: Pahl-Rugenstein.

- Zacharias, Klaus (1997): Der heilige Liborius im Paderborner Stadtbild. Ein Rundgang auf den Spuren des Diözesan- und Stadtpatrons. *Die Warte* 94, 23–25.
- Ziem, Alexander (2006): Begriffe, Topoi, Wissensrahmen. Perspektiven einer semantischen Analyse gesellschaftlichen Wissens. In: Wengeler, Martin (Hrsg.): *Sprachgeschichte als Zeitgeschichte. Konzepte, Methoden und Forschungsergebnisse der Düsseldorfer Sprachgeschichtsschreibung für die Zeit nach 1945*. Hildesheim, New York: Olms, 315–348.
- Ziem, Alexander (2008a): *Frames und sprachliches Wissen. Kognitive Aspekte der semantischen Kompetenz*. Berlin, New York: de Gruyter.
- Ziem, Alexander (2008b): Frame-Semantik und Diskursanalyse – Skizze einer kognitionswissenschaftlich inspirierten Methode zur Analyse gesellschaftlichen Wissens. In: Warnke, Ingo H./Spitzmüller, Jürgen (Hrsg.): *Methoden der Diskurslinguistik. Sprachwissenschaftliche Zugänge zur transtextuellen Ebene*. Berlin, Boston: de Gruyter, 89–116.
- Ziem, Alexander (2010): Fußball als Interdiskurs: Lexikalische Felder, konzeptuelle Metaphern und Domänenmischung. *Zeitschrift für Semiotik* 32, H. 3–4, 305–328.
- Ziem, Alexander (2013): Kognitive Abstraktionsstufen deklarativen Wissens: Evidenz aus korpusbasierten Fallstudien. In: Felder, Ekkehard (Hrsg.): *Faktizitätsherstellung in Diskursen. Die Macht des Deklarativen*. Berlin, Boston: de Gruyter, 147–172.
- Ziem, Alexander (2015): Nullinstanzierungen im gesprochenen Deutsch: Kohärenz durch grammatische Konstruktionen? In: Bückner, Jörg/Günthner, Susanne/Imo, Wolfgang (Hrsg.): *Konstruktionsgrammatik V. Konstruktionen im Spannungsfeld von sequenziellen Mustern, kommunikativen Gattungen und Textsorten*. Tübingen: Stauffenburg, 45–80.
- Ziem, Alexander/Scholz, Ronny/Römer, David (2012): Korpusgestützte Zugänge zum öffentlichen Sprachgebrauch: spezifisches Vokabular, semantische Konstruktionen, syntaktische Muster in Diskursen über „Krisen“. In: Felder, Ekkehard (Hrsg.): *Faktizitätsherstellung in Diskursen. Die Macht des Deklarativen*. Berlin, Boston: de Gruyter, 329–358.
- Zifonun, Gisela/Hoffmann, Ludger/Strecker, Bruno u.a. (1997): *Grammatik der deutschen Sprache*. 3 Bde. Berlin, New York: de Gruyter.
- Zirbel, Michael (2013): *Auf der Suche nach dem Leitbild. Das situative Prinzip und die städtebauliche Entwicklung der Mittelstadt Gütersloh 1945–1969*. Aachen: Shaker.
